# Supplementary material for: Unraveling the Neuroprotective Effect of Natural Bioactive Compounds Involved in the Modulation of Ischemic Stroke by Network Pharmacology
Source: MDPI journal article supplement (doi:10.3390/ph16101376), 2023-09-28
Supplement: s1 [file s1]

[illegible]



|          |            |
|----------|------------|
| 17 Sroke | Flavonoids |
| 18 Sroke | Flavonoids |
| 19 Sroke | Flavonoids |
| 19 Sroke | Flavonoids |
| 19 Sroke | Flavonoids |
| 20 Sroke | Flavonoids |
| 21 Sroke | Flavonoids |
| 21 Sroke | Flavonoids |
| 22 Sroke | Flavonoids |
| 22 Sroke | Flavonoids |
| 23 Sroke | Flavonoids |
| 24 Sroke | Flavonoids |
| 25 Sroke | Flavonoids |
| 26 Sroke | Flavonoids |
| 27 Sroke | Flavonoids |
| 27 Sroke | Flavonoids |
| 28 Sroke | Alkaloids  |
| 28 Sroke | Alkaloids  |

|          |             |
|----------|-------------|
| 28 Sroke | Alkaloids   |
| 29 Sroke | Alkaloids   |
| 30 Sroke | Alkaloids   |
| 30 Sroke | Alkaloids   |
| 30 Sroke | Alkaloids   |
| 31 Sroke | Alkaloids   |
| 31 Sroke | Alkaloids   |
| 32 Sroke | Alkaloids   |
| 33 Sroke | Alkaloids   |
| 34 Sroke | Alkaloids   |
| 35 Sroke | Alkaloids   |
| 35 Sroke | Alkaloids   |
| 35 Sroke | Alkaloids   |
| 36 Sroke | Alkaloids   |
| 37 Sroke | Polyphenols |
| 38 Sroke | Polyphenols |
| 39 Sroke | Polyphenols |
| 39 Sroke | Polyphenols |
| 39 Sroke | Polyphenols |
| 40 Sroke | Polyphenols |
| 41 Sroke | Polyphenols |
| 41 Sroke | Polyphenols |

|          |             |
|----------|-------------|
| 42 Sroke | Polyphenols |
| 43 Sroke | Polyphenols |
| 44 Sroke | Polyphenols |
| 45 Sroke | Polyphenols |
| 45 Sroke | Polyphenols |
| 45 Sroke | Polyphenols |
| 46 Sroke | Polyphenols |
| 47 Sroke | Glycosides  |
| 48 Sroke | Glycosides  |
| 48 Sroke | Glycosides  |
| 48 Sroke | Glycosides  |
| 49 Sroke | Glycosides  |
| 50 Sroke | Glycosides  |
| 51 Sroke | Glycosides  |
| 51 Sroke | Glycosides  |
| 51 Sroke | Glycosides  |

[illegible]

|          |            |
|----------|------------|
| 65 Sroke | Saponin    |
| 65 Sroke | Saponin    |
| 66 Sroke | Saponin    |
| 67 Sroke | Saponin    |
| 67 Sroke | Saponin    |
| 67 Sroke | Saponin    |
| 68 Sroke | Terpenoids |
| 68 Sroke | Terpenoids |
| 69 Sroke | Terpenoids |
| 70 Sroke | Terpenoids |
| 71 Sroke | Terpenoids |
| 72 Sroke | Terpenoids |
| 73 Sroke | Terpenoids |
| 74 Sroke | Terpenoids |
| 74 Sroke | Terpenoids |
| 74 Sroke | Terpenoids |
| 75 Sroke | Terpenoids |
| 76 Sroke | Terpenoids |
| 76 Sroke | Terpenoids |
| 76 Sroke | Terpenoids |
| 77 Sroke | Terpenoids |
| 77 Sroke | Terpenoids |
| 77 Sroke | Terpenoids |

[illegible]



[illegible]

**Chemical compound**

Baicalin

Scutellarin

## Scutellarin

## Scutellarin

## Scutellarin

## Scutellarin

## Scutellarin

Vitexin

Vitexin

Vitexin

## Vitexin

Vitexin

Vitexin

## Vitexin

## Vitexin

## Apigenin

Icariin

Quercetin

Quercetin

Quercetin

Quercetin

Quercetin

Quercetin

Quercetin

Quercetin

Calycosin

Calycosin

Calycosin

Calycosin

Calycosin

Calycosin

Calycosin

Calycosin

Calycosin

Xanthohumol

Xanthohumol

Xanthohumol

Xanthohumol

Xanthohumol

Carthamin yellow

Carthamin yellow

Carthamin yellow

Carthamin yellow

Carthamin yellow

Carthamin yellow

Dihydromyricetin

Dihydromyricetin

Berberine

Berberine

Berberine

Berberine

Berberine

Berberine

Berberine

Ligustrazine/tetramethylpyrazine

Daurisoline

Daurisoline

Daurisoline

Daurisoline

Tetrahydropalmatine

Tetrahydropalmatine

Tetrahydropalmatine

Tetrahydropalmatine

Tetrahydropalmatine

Tetrahydropalmatine

Tetrahydropalmatine

Neferine

Curcumin

Salidroside

Salidroside

Geniposide

## Geniposide

## Geniposide

## Geniposide

## Geniposide

Geniposide

## Geniposide

## Catalpol

## Catalpol

## Catalpol

## Picroside II

### Picroside II

## Picroside II

## Picroside II

Ginsenoside Rg1

## Ginsenoside Rg1

Astragaloside IV

Astragaloside IV  
Astragaloside IV  
Astragaloside IV  
Astragaloside IV  
Astragaloside IV  
Astragaloside IV  
Astragaloside IV  
Astragaloside IV  
Panax notoginseng saponin (TSPN)  
Panax notoginseng saponin (TSPN)  
Panax notoginseng saponin (TSPN)  
Panax notoginseng saponin (TSPN)  
Andrographolide  
Andrographolide  
Andrographolide  
Andrographolide  
Andrographolide  
Andrographolide  
Andrographolide  
Andrographolide  
Ginkgolide B  
Ginkgolide B  
Ginkgolide B  
Ginkgolide B  
Ginkgolide A (GA), ginkgolide B (GB), ginkgolide K (GK) and bilobalide (BB)  
Ginkgolide A (GA), ginkgolide B (GB), ginkgolide K (GK) and bilobalide (BB)  
Ginkgolide B (GB)  
Ginkgolides A, B and C  
Ginkgolides A, B and C  
Ginkgolides A, B and C  
Ginkgolides A (GA), Ginkgolides B (GB), and Ginkgolides K (GK)  
Ginkgolides A (GA), Ginkgolides B (GB), and Ginkgolides K (GK)  
Ginkgolides A (GA), Ginkgolides B (GB), and Ginkgolides K (GK)  
Ginkgolides A (GA), Ginkgolides B (GB), and Ginkgolides K (GK)  
10-O-(N N-dimethylaminoethyl)-ginkgolide B methane-sulfonate (XQ-1H)  
10-O-(N N-dimethylaminoethyl)-ginkgolide B methane-sulfonate (XQ-1H)  
10-O-(N N-dimethylaminoethyl)-ginkgolide B methane-sulfonate (XQ-1H)  
Borneol  
Borneol  
Borneol



Borneol  
Borneol  
Borneol  
Borneol  
Borneol  
Borneol  
Borneol  
Borneol  
Borneol  
Borneol  
Borneol  
Borneol  
Borneol  
Borneol  
Borneol  
Borneol  
Borneol  
Daidzein  
Daidzein  
Daidzein  
Daidzein  
Emodin  
Emodin  
Emodin  
Emodin  
Emodin  
Emodin  
Emodin  
Cordycepin  
Fucose  
Fucose  
Fucose  
Fucose  
Fucose  
Fucose  
Fucose

Fucose

Fucose

Fucose

Fucose

Fucose

Fucose

Fucose

Fucose

Fucose

Fucose

Fucose

Fucose

Fucose

Cannabidiol

Cannabidiol

Cannabidiol

Cannabidiol

Cannabidiol

Cannabidiol

Cannabidiol

Cannabidiol

Cinnamaldehyde

**Model**

Gerbils

Sprague–Dawley (SD) rats

Murine BV-2 microglial cell line

Wistar rats

Wistar rats

Wistar rats

Wistar rats

Wistar rats

Human brain microvascular endothelial cells (HBMECs) cell culture with oxygen and glucose deprivation/reoxy

Human brain microvascular endothelial cells (HBMECs) cell culture with oxygen and glucose deprivation/reoxy

Human brain microvascular endothelial cells (HBMECs) cell culture with oxygen and glucose deprivation/reoxy

Sprague–Dawley (SD) rats

Human brain microvascular endothelial cells (HBMVECs)

Human brain microvascular endothelial cells (HBMVECs)

Human brain microvascular endothelial cells (HBMVECs)

Sprague–Dawley (SD) rats

Primary microglia culture

Sprague–Dawley (SD) rats

PC12 oxygen-glucose-deprived (OGD) cells

PC12 oxygen-glucose-deprived (OGD) cells

PC12 oxygen-glucose-deprived (OGD) cells

Wistar rats

Wistar rats

Wistar rats

Wistar rats

Sprague–Dawley (SD) rats

Wistar rats

Wistar rats

Wistar rats

Wistar rats

Wistar rats

Sprague–Dawley (SD) rats

C57BL/6N mice

C57BL/6N mice

C57BL/6N mice

PC12 oxygen-glucose-deprived (OGD) cells

Sprague–Dawley (SD) rats

Primary cultures of cortical neurons

Primary cultures of cortical neurons

Primary cultures of cortical neurons

C57BL/6 mice

Mouse N2a cells culture

Mouse N2a cells culture

Mouse N2a cells culture

PC12 oxygen-glucose-deprived (OGD) cells

PC12 oxygen-glucose-deprived (OGD) cells

PC12 oxygen-glucose-deprived (OGD) cells

Sprague–Dawley (SD) rats

Sprague–Dawley (SD) rats

Sprague–Dawley (SD) rats

Sprague–Dawley (SD) rats

Wistar rats

Wistar rats

Wistar rats

Wistar rats

Wistar rats

Sprague–Dawley (SD) rats

ICR mice

ICR mice

ICR mice

ICR mice

ICR mice

ICR mice

Primary cultured mouse cortical neuron

Primary cultured mouse cortical neuron

Primary cultured mouse cortical neuron

C57BL/6 mice

OGD/R model in BV2 cells

Sprague–Dawley (SD) rats

Sprague–Dawley (SD) rats

Sprague–Dawley (SD) rats

### Sprague–Dawley (SD) rats

### OGD/R model in BV2 cells

## OGD/R model in BV2 cells

### Sprague–Dawley (SD) rats

Sprague–Dawley (SD) rats

## Gerbils

## Gerbils

## Gerbils

## Wistar rats

### Sprague–Dawley (SD) rats

ICR mice

### Sprague–Dawley (SD) rats

### Sprague–Dawley (SD) rats

Sprague–Dawley (SD) rats

### Sprague–Dawley (SD) rats

### Sprague–Dawley (SD) rats

### Sprague–Dawley (SD) rats

### Sprague–Dawley (SD) rats



Sprague–Dawley (SD) rats  
Sprague–Dawley (SD) rats  
Sprague–Dawley (SD) rats  
Sprague–Dawley (SD) rats  
Sprague–Dawley (SD) rats  
Sprague–Dawley (SD) rats  
Sprague–Dawley (SD) rats  
Sprague–Dawley (SD) rats  
Wistar rats  
Wistar rats  
Wistar rats  
Wistar rats  
ICR mice  
ICR mice  
Cerebral endothelial cells (CECs) cultures  
Cerebral endothelial cells (CECs) cultures  
Male 6-week-old specific pathogen-free (SPF) Kunming mice  
Wistar rats  
Wistar rats  
Wistar rats  
Wistar rats  
SH-SY5Y cells  
Sprague–Dawley (SD) rats  
PC12 oxygen-glucose-deprived (OGD) cells  
PC12 oxygen-glucose-deprived (OGD) cells  
PC12 oxygen-glucose-deprived (OGD) cells  
Sprague–Dawley (SD) rats  
Sprague–Dawley (SD) rats  
Sprague–Dawley (SD) rats  
Sprague–Dawley (SD) rats  
Wistar rats  
PC12 oxygen-glucose-deprived (OGD) cells  
PC12 oxygen-glucose-deprived (OGD) cells  
Primary neuronal cultures of cerebral cortex  
Primary neuronal cultures of cerebral cortex  
Primary neuronal cultures of cerebral cortex

Primary neuronal cultures of cerebral cortex

Sprague–Dawley (SD) rats

ICR rats

ICR rats

ICR rats

ICR rats

HT22 cells

HT22 cells

HT22 cells

PC12 oxygen-glucose-deprived (OGD) cells

PC12 oxygen-glucose-deprived (OGD) cells

PC12 oxygen-glucose-deprived (OGD) cells

PC12 oxygen-glucose-deprived (OGD) cells

Male kunming mice

Sprague–Dawley (SD) rats

C57BL/6 mice

C57BL/6 mice

C57BL/6 mice

C57BL/6 mice

C57BL/6 mice

C57BL/6 mice

Sprague–Dawley (SD) rats

Gerbils

Wistar rats

Wistar rats

Wistar rats

Male Swiss mice

C57BL/6 mice





|                 |                          |
|-----------------|--------------------------|
| <i>In vitro</i> | Neuroinflammation        |
| <i>In vitro</i> | Neuroinflammation        |
| <i>In vitro</i> | Neuronal apoptosis       |
| <i>In vitro</i> | Neuronal apoptosis       |
| <i>In vivo</i>  | Brain infarction         |
| <i>In vivo</i>  | Neuronal apoptosis       |
| <i>In vivo</i>  | Brain infarction         |
| <i>In vivo</i>  | Glutamate excitotoxicity |
| <i>In vivo</i>  | Glutamate excitotoxicity |
| <i>In vivo</i>  | Brain infarction         |
| <i>In vivo</i>  | Oxidative stress         |
| <i>In vivo</i>  | Oxidative stress         |
| <i>In vivo</i>  | Neuronal apoptosis       |
| <i>In vivo</i>  | Neuronal apoptosis       |
| <i>In vivo</i>  | Brain infarction         |
| <i>In vivo</i>  | Neuroinflammation        |
| <i>In vivo</i>  | Neuroplasticity          |
| <i>In vivo</i>  | Neuroplasticity          |
| <i>In vivo</i>  | Brain infarction         |
| <i>In vivo</i>  | Autophagy dysfunction    |
| <i>In vivo</i>  | Brain infarction         |
| <i>In vivo</i>  | Glutamate excitotoxicity |
| <i>In vivo</i>  | Neuroinflammation        |
| <i>In vivo</i>  | Neuroinflammation        |
| <i>In vivo</i>  | Neuronal apoptosis       |
| <i>In vivo</i>  | Brain infarction         |
| <i>In vivo</i>  | Neuronal apoptosis       |
| <i>In vivo</i>  | Neuronal apoptosis       |
| <i>In vivo</i>  | Neuronal apoptosis       |
| <i>In vivo</i>  | Oxidative stress         |
| <i>In vivo</i>  | Oxidative stress         |
| <i>In vivo</i>  | Mitochondrial damage     |
| <i>In vivo</i>  | Mitochondrial damage     |
| <i>In vitro</i> | Neuronal apoptosis       |
| <i>In vitro</i> | Neuronal apoptosis       |

|                 |                       |
|-----------------|-----------------------|
| <i>In vitro</i> | Neuronal apoptosis    |
| <i>In vivo</i>  | Brain infarction      |
| <i>In vivo</i>  | Neuroinflammation     |
| <i>In vivo</i>  | Oxidative stress      |
| <i>In vivo</i>  | Oxidative stress      |
| <i>In vivo</i>  | Brain infarction      |
| <i>In vivo</i>  | Oxidative stress      |
| <i>In vivo</i>  | Neuronal apoptosis    |
| <i>In vitro</i> | Brain infarction      |
| <i>In vitro</i> | Integrity of BBB      |
| <i>In vitro</i> | Integrity of BBB      |
| <i>In vitro</i> | Mitochondrial damage  |
| <i>In vivo</i>  | Neuroinflammation     |
| <i>In vivo</i>  | Neuroinflammation     |
| <i>In vivo</i>  | Neuroinflammation     |
| <i>In vivo</i>  | Autophagy dysfunction |
| <i>In vivo</i>  | Autophagy dysfunction |
| <i>In vivo</i>  | Brain infarction      |
| <i>In vivo</i>  | Neuroinflammation     |
| <i>In vitro</i> | Neuronal apoptosis    |
| <i>In vitro</i> | Neuronal apoptosis    |
| <i>In vitro</i> | Neuronal apoptosis    |
| <i>In vivo</i>  | Brain infarction      |
| <i>In vitro</i> | Neuronal apoptosis    |
| <i>In vitro</i> | Neuronal apoptosis    |
| <i>In vitro</i> | Neuronal apoptosis    |
| <i>In vitro</i> | Autophagy dysfunction |
| <i>In vitro</i> | Autophagy dysfunction |

|                 |                          |
|-----------------|--------------------------|
| <i>In vitro</i> | Brain infarction         |
| <i>In vivo</i>  | Mitochondrial damage     |
| <i>In vivo</i>  | Activated microglia      |
| <i>In vivo</i>  | Neuroinflammation        |
| <i>In vivo</i>  | Brain infarction         |
| <i>In vivo</i>  | Integrity of BBB         |
| <i>In vivo</i>  | Integrity of BBB         |
| <i>In vivo</i>  | Brain infarction         |
| <i>In vivo</i>  | Autophagy dysfunction    |
| <i>In vivo</i>  | Neuroinflammation        |
| <i>In vivo</i>  | Activated microglia      |
| <i>In vivo</i>  | Activated microglia      |
| <i>In vivo</i>  | Activated microglia      |
| <i>In vitro</i> | Neuronal apoptosis       |
| <i>In vitro</i> | Neuronal apoptosis       |
| <i>In vitro</i> | Glutamate excitotoxicity |
| <i>In vivo</i>  | Brain infarction         |
| <i>In vivo</i>  | Activated microglia      |
| <i>In vivo</i>  | Neuroinflammation        |
| <i>In vitro</i> | Neuronal apoptosis       |
| <i>In vitro</i> | Neuroinflammation        |
| <i>In vitro</i> | Neuroinflammation        |
| <i>In vitro</i> | Neuroinflammation        |
| <i>In vivo</i>  | Neuroinflammation        |
| <i>In vivo</i>  | Neuroinflammation        |
| <i>In vivo</i>  | Neuroinflammation        |



[illegible]

|                 |                     |
|-----------------|---------------------|
| <i>In vivo</i>  | Neuronal apoptosis  |
| <i>In vivo</i>  | Neuronal apoptosis  |
| <i>In vivo</i>  | Brain infarction    |
| <i>In vivo</i>  | Neuroinflammation   |
| <i>In vivo</i>  | Brain infarction    |
| <i>In vivo</i>  | Neuronal apoptosis  |
| <i>In vivo</i>  | Neuronal apoptosis  |
| <i>In vivo</i>  | Neuronal apoptosis  |
| <i>In vivo</i>  | Activated microglia |
| <i>In vivo</i>  | Activated microglia |
| <i>In vitro</i> | Neuronal apoptosis  |
| <i>In vitro</i> | Oxidative stress    |
| <i>In vivo</i>  | Neuronal apoptosis  |
| <i>In vivo</i>  | Neuronal apoptosis  |
| <i>In vivo</i>  | Neuroinflammation   |
| <i>In vivo</i>  | Neuroinflammation   |
| <i>In vivo</i>  | Neuroinflammation   |
| <i>In vivo</i>  | Brain infarction    |
| <i>In vivo</i>  | Neuroinflammation   |
| <i>In vivo</i>  | Neuroinflammation   |
| <i>In vivo</i>  | Neuroinflammation   |
| <i>In vitro</i> | Oxidative stress    |
| <i>In vivo</i>  | Brain infarction    |
| <i>In vivo</i>  | Oxidative stress    |
| <i>In vitro</i> | Brain infarction    |
| <i>In vitro</i> | Neuronal apoptosis  |
| <i>In vitro</i> | Neuronal apoptosis  |
| <i>In vivo</i>  | Brain infarction    |
| <i>In vivo</i>  | Neuroinflammation   |
| <i>In vivo</i>  | Neuroinflammation   |
| <i>In vivo</i>  | Neuroinflammation   |
| <i>In vivo</i>  | Brain infarction    |
| <i>In vitro</i> | Neuronal apoptosis  |
| <i>In vitro</i> | Neuronal apoptosis  |
| <i>In vitro</i> | Oxidative stress    |
| <i>In vitro</i> | Oxidative stress    |
| <i>In vitro</i> | Oxidative stress    |

|                 |                     |
|-----------------|---------------------|
| <i>In vitro</i> | Oxidative stress    |
| <i>In vivo</i>  | Neuroplasticity     |
| <i>In vivo</i>  | Neuroplasticity     |
| <i>In vivo</i>  | Brain infarction    |
| <i>In vivo</i>  | Neuronal apoptosis  |
| <i>In vivo</i>  | Brain infarction    |
| <i>In vivo</i>  | Oxidative stress    |
| <i>In vivo</i>  | Neuroplasticity     |
| <i>In vivo</i>  | Neuroplasticity     |
| <i>In vitro</i> | Neuronal apoptosis  |
| <i>In vitro</i> | Neuronal apoptosis  |
| <i>In vitro</i> | Neuronal apoptosis  |
| <i>In vitro</i> | Brain infarction    |
| <i>In vitro</i> | Oxidative stress    |
| <i>In vitro</i> | Neurotransmission   |
| <i>In vitro</i> | Neuronal apoptosis  |
| <i>In vivo</i>  | Brain infarction    |
| <i>In vivo</i>  | Neurotransmission   |
| <i>In vivo</i>  | Neurotransmission   |
| <i>In vivo</i>  | Oxidative stress    |
| <i>In vivo</i>  | Neuroinflammation   |
| <i>In vivo</i>  | Brain infarction    |
| <i>In vivo</i>  | Brain infarction    |
| <i>In vivo</i>  | Activated microglia |
| <i>In vivo</i>  | Activated microglia |
| <i>In vivo</i>  | Neuroinflammation   |
| <i>In vivo</i>  | Neuroinflammation   |
| <i>In vivo</i>  | Neuroinflammation   |
| <i>In vivo</i>  | Brain infarction    |
| <i>In vivo</i>  | Neuroinflammation   |
| <i>In vivo</i>  | Oxidative stress    |
| <i>In vivo</i>  | Oxidative stress    |

|                |                     |
|----------------|---------------------|
| <i>In vivo</i> | Neuronal apoptosis  |
| <i>In vivo</i> | Neuronal apoptosis  |
| <i>In vivo</i> | Neuronal apoptosis  |
| <i>In vivo</i> | Oxidative stress    |
| <i>In vivo</i> | Activated microglia |
| <i>In vivo</i> | Oxidative stress    |
| <i>In vivo</i> | Brain infarction    |
| <i>In vivo</i> | Neuroplasticity     |
| <i>In vivo</i> | Brain infarction    |
| <i>In vivo</i> | Brain infarction    |
| <i>In vivo</i> | Brain infarction    |
| <i>In vivo</i> | Activated microglia |
| <i>In vivo</i> | Activated microglia |
| <i>In vivo</i> | Neuroplasticity     |
| <i>In vivo</i> | Brain infarction    |
| <i>In vivo</i> | Oxidative stress    |
| <i>In vivo</i> | Neuroinflammation   |
| <i>In vivo</i> | Neuroinflammation   |
| <i>In vivo</i> | Neuroinflammation   |

## Dosis

100 and 200mg/kg

100 and 200mg/kg

100 and 200mg/kg

100 and 200mg/kg

100 mg/kg

200 mg/kg

137.5, 68.75, 34.38, 17.19, 8.59, 4.30, 2.15, and 1.08  $\mu\text{g/ml}$

137.5, 68.75, 34.38, 17.19, 8.59, 4.30, 2.15, and 1.08  $\mu\text{g/ml}$

137.5, 68.75, 34.38, 17.19, 8.59, 4.30, 2.15, and 1.08  $\mu\text{g/ml}$

50, 100 or 200 mg/kg

100 mg/kg

2, 10, 50  $\mu$ M for 30 min

0.25 mg/L

0.25 mg/L  
0.25 mg/L  
0.25 mg/L  
0.25 mg/L  
60 mg/kg  
10 mg/kg  
10 mg/kg  
10 mg/kg  
5, 10, and 20 mg/kg  
7.5, 15, 30 mg/kg  
7.5, 15, 30 mg/kg  
30 mg/kg  
30 mg/kg  
5, 10, 20 mg/kg/d  
0.5 µg/mL  
10 or 50 mg/kg  
10 or 50 mg/kg  
10 or 50 mg/kg  
10 or 50 mg/kg  
20 or 40 mg/kg  
75 mg/kg  
75 mg/kg  
0.2, 0.02, 0.002 mg/kg  
0.2, 0.02, 0.002 mg/kg

0.2, 0.02, 0.002 mg/kg  
40mg/kg  
40mg/kg  
40mg/kg  
40mg/kg  
20 mg/kg  
20 mg/kg  
20 mg/kg  
10, 20 or 40 mg/kg  
10, 20 or 40 mg/kg  
1, 3, and 10 mg/kg  
5 and 10 mg/kg  
5 and 10 mg/kg  
5 and 10 mg/kg  
5 and 10 mg/kg  
12.5, 25, and 50 mg/kg  
10, 20, 40 mg/kg  
10, 20, 40 mg/kg  
10, 20, 40 mg/kg  
-  
200 mg/kg  
200 mg/kg  
200 mg/kg  
201 mg/kg  
201 mg/kg  
3 mg/kg  
3 mg/kg  
3 mg/kg  
3 mg/kg  
3 mg/kg  
0.25-1.0  $\mu$ M  
0.25-1.0  $\mu$ M  
0.25-1.0  $\mu$ M  
100, 200, 300, 400 mg/kg  
5, 15, 25, and 35  $\mu$ mol/L  
5, 15, 25, and 35  $\mu$ mol/L  
5, 15, 25, and 35  $\mu$ mol/L  
1.25–20  $\mu$ M  
1.25–20  $\mu$ M



100 mg/kg  
50, 100 mg/kg  
50, 100 mg/kg  
50, 100 mg/kg  
50, 100 mg/kg  
30 mg/kg  
30 mg/kg  
30 mg/kg  
30 mg/kg  
30 mg/kg  
50 mg/kg  
50 mg/kg  
50 mg/kg  
100 mg/kg  
100 mg/kg  
100 mg/kg  
100 mg/kg  
100 mg/kg  
40 and 60 mg/kg  
10 µmol/L  
10 µmol/L  
10 µmol/L  
2.5, 5, 10, and 20 mg/kg/day  
0, 6.25, 12.5, 25, 50, or 100 µM  
100 mg/kg/day  
100 mg/kg/day  
100 mg/kg/day

12.5, 25, and 50 mg/kg

12.5, 25, and 50 mg/kg  
12.5, 25, and 50 mg/kg  
10 ml/kg  
10 ml/kg  
10 ml/kg  
10 ml/kg  
10 ml/kg  
10 ml/kg  
50, 100, and 200 mg/kg  
10 or 100 µg/kg  
10 or 100 µg/kg  
20-100 µM  
10 µM  
120 mg/kg  
120 mg/kg  
120 mg/kg  
120 mg/kg  
120 mg/kg  
2. 5, 5, 10 mg/kg  
25 mg/L  
1 mg/kg, 2 mg/kg, and 4 mg/kg  
10 µmol/L  
10 µmol/L  
10 µmol/L  
1.25 mg/kg  
1.25 mg/kg  
1.25 mg/kg  
1.25 mg/kg  
7.8, 15.6, 31.2 mg/kg  
1 µM, 3 µM, 10 µM, 50 µM, 100 µM  
1 µM, 3 µM, 10 µM, 50 µM, 100 µM  
0.003 to 0.3 µM  
0.003 to 0.3 µM  
0.003 to 0.3 µM

0.003 to 0.3  $\mu$ M

0.2 g/kg

20 and 30 mg/kg

20 and 30 mg/kg

20 and 30 mg/kg

20 and 30 mg/kg

10–40 mM

10–40 mM

10–40 mM

15mg/kg

15mg/kg

15mg/kg

15mg/kg

10 mg/kg, 20 mg/kg

10 mg/kg

80 mg/kg or 160 mg/kg

50 mg/kg

10 mg/kg

10 mg/kg

1 mg/kg

3, 10, and 30 mg/kg

10mg/kg

10mg/kg

10mg/kg

10mg/kg

10-30 mg/kg

## Activity

Inhibited the expression of Caspase-3

Inhibited the expression of Caspase-3

Promoted the expression of BDNF

Promoted the expression of BDNF

Attenuating the phosphorylation level of CaMKII and prevented OGD-induced apoptosis of hippocampal or SH-

Increase of GABA(A)R  $\alpha$ 1, GABA(A)R  $\gamma$ 2 and KCC2 mRNA and protein levels

Increase of GABA(A)R  $\alpha$ 1, GABA(A)R  $\gamma$ 2 and KCC2 mRNA and protein levels

Increase of GABA(A)R  $\alpha$ 1, GABA(A)R  $\gamma$ 2 and KCC2 mRNA and protein levels

Increase of GABA(A)R  $\alpha$ 1, GABA(A)R  $\gamma$ 2 and KCC2 mRNA and protein levels

Increase of GABA(A)R  $\alpha$ 1, GABA(A)R  $\gamma$ 2 and KCC2 mRNA and protein levels

Increase of GABA(A)R  $\alpha$ 1, GABA(A)R  $\gamma$ 2 and KCC2 mRNA and protein levels

Decrease of NKCC1 at mRNA and protein levels

Decrease of NKCC1 at mRNA and protein levels

Increase the release of PI3K, Akt via MAPK/ERK

Increase the release of PI3K, Akt via MAPK/ERK

Increased levels of BDNF

Enhancing BCL-2 and MCL-1 expression by triggering the CArG box

Enhancing BCL-2 and MCL-1 expression by triggering the CArG box

Enhancing BCL-2 and MCL-1 expression by triggering the CArG box

Enhancing BCL-2 and MCL-1 expression by triggering the CArG box

Suppressed NF- $\kappa$ B signaling by reducing I $\kappa$ B $\alpha$  phosphorylation and nuclear translocation of NF- $\kappa$ B/p65, which d

Suppressed NF- $\kappa$ B signaling by reducing I $\kappa$ B $\alpha$  phosphorylation and nuclear translocation of NF- $\kappa$ B/p65, which d

Suppressed NF- $\kappa$ B signaling by reducing I $\kappa$ B $\alpha$  phosphorylation and nuclear translocation of NF- $\kappa$ B/p65, which d

Increased the Bcl-2 expression

Reduced Bax and caspase-3 expression

Reduced Bax and caspase-3 expression

Increase expression of the PI3K, Akt, mTOR proteins

Increase expression of the PI3K, Akt, mTOR proteins

Increase expression of the PI3K, Akt, mTOR proteins

Enhanced expression of MAP-2, BDNF, NT-3 and IGF-1

Suppressed expression of proinflammatory mediators (iNOS, TNF- $\alpha$ , and IL-1 $\beta$ ) in in activated microglia/brain i

Suppressed expression of proinflammatory mediators (iNOS, TNF- $\alpha$ , and IL-1 $\beta$ ) in in activated microglia/brain i

Suppressed expression of proinflammatory mediators (iNOS, TNF- $\alpha$ , and IL-1 $\beta$ ) in in activated microglia/brain i

Decreased expression of proinflammatory markers in AM/BM through suppressing the p-JNK and p-p38 MAPK:

Decreased expression of proinflammatory markers in AM/BM through suppressing the p-JNK and p-p38 MAPK:

Inhibited LPS-induced production of proinflammatory mediators such as NO, TNF $\alpha$ , IL-1 $\beta$  and ROS

Inhibited LPS-induced production of proinflammatory mediators such as NO, TNF $\alpha$ , IL-1 $\beta$  and ROS

Inhibited LPS-induced production of proinflammatory mediators such as NO, TNF $\alpha$ , IL-1 $\beta$  and ROS

Inhibited LPS-induced production of proinflammatory mediators such as NO, TNF $\alpha$ , IL-1 $\beta$  and ROS

Inhibited LPS-induced production of proinflammatory mediators such as NO, TNF $\alpha$ , IL-1 $\beta$  and ROS

Inhibited LPS-induced production of proinflammatory mediators such as NO, TNF $\alpha$ , IL-1 $\beta$  and ROS

Inhibited LPS-induced production of proinflammatory mediators such as NO, TNF $\alpha$ , IL-1 $\beta$  and ROS

Inhibited LPS-induced production of proinflammatory mediators such as NO, TNF $\alpha$ , IL-1 $\beta$  and ROS

[illegible]

Reduce the the expression of IL-1  $\beta$ , IL-6, TNF- $\alpha$ , XBP1u, XBP1s and caspase-3

Reduce the the expression of IL-1  $\beta$ , IL-6, TNF- $\alpha$ , XBP1u, XBP1s and caspase-3

Reduce the overexpression of p-IRE1 $\alpha$  related with ER stress and apoptosis

Reduce the overexpression of p-IRE1 $\alpha$  related with ER stress and apoptosis

Icariin enhanced the effect of therapeutic hypothermia on infarct and neurological deficits in MCAO rats

Downregulated the expressions of TNF- $\alpha$ , IL-6, C-Caspase 3 and Bax, and the activation of PPARs/Nrf2/NF- $\kappa$ B al

Downregulated the expressions of TNF- $\alpha$ , IL-6, C-Caspase 3 and Bax, and the activation of PPARs/Nrf2/NF- $\kappa$ B al

Downregulated the expressions of TNF- $\alpha$ , IL-6, C-Caspase 3 and Bax, and the activation of PPARs/Nrf2/NF- $\kappa$ B al

Downregulated the expressions of TNF- $\alpha$ , IL-6, C-Caspase 3 and Bax, and the activation of PPARs/Nrf2/NF- $\kappa$ B al

Downregulated the expressions of TNF- $\alpha$ , IL-6, C-Caspase 3 and Bax, and the activation of PPARs/Nrf2/NF- $\kappa$ B al

Downregulated the expressions of TNF- $\alpha$ , IL-6, C-Caspase 3 and Bax, and the activation of PPARs/Nrf2/NF- $\kappa$ B al

Downregulated the expressions of TNF- $\alpha$ , IL-6, C-Caspase 3 and Bax, and the activation of PPARs/Nrf2/NF- $\kappa$ B al

Elevated the expression of Bcl-2

quercetin administration attenuated the permanent middle cerebral artery occlusion (pMCAO)-induced increa

Quercetin treatment attenuated the increase of caspase-3

Quercetin treatment attenuated the increase of caspase-3

Lower degree of infarct volume, and brain water content than the vehicle-treated rats

Decreased the ROS and MDA production, and increased the activity of SOD and CAT in brains of MCAO/R rats

Decreased the ROS and MDA production, and increased the activity of SOD and CAT in brains of MCAO/R rats

Downregulation of cleaved caspase-3 protein

Upregulation of Bcl-2 protein level

Ameliorated neurologic deficit and infarct volume after cerebral ischemia reperfusion

Inhibit the expression of 4-Hydroxy-2-nonenal (4-HNE).

Increased the cerebral expression of BDNF/TrkB,

Increased the cerebral expression of BDNF/TrkB,

Decreased infarct volume and brain edema, and ameliorated neurological scores

Upregulated the expression of p62, NBR1 and Bcl-2

Upregulated the expression of p62, NBR1 and Bcl-2

Upregulated the expression of p62, NBR1 and Bcl-2

Downregulated the level of TNF- $\alpha$ .

treatment of XN improved MCAO-induced brain injury by reducing infarct size, improving neurological deficits

Ameliorated glutamate concentration elevation, and CA3 neuron death

Decrease of mitochondrial fusion protein Mfn-2 and antiapoptotic protein Bcl-2 expression

Decrease of mitochondrial fusion protein Mfn-2 and antiapoptotic protein Bcl-2 expression

Inhibition of Apaf-1 expression and caspase-3 activation

Attenuated the neurological deficit score, brain water content and infarct area

Decreased serum TNF- $\alpha$ , IL-1 $\beta$  and IL-6 concentrations

Decreased serum TNF- $\alpha$ , IL-1 $\beta$  and IL-6 concentrations

Decreased serum TNF- $\alpha$ , IL-1 $\beta$  and IL-6 concentrations

Decrease levels of ACSL4 and TFR1 in the cortex that attenuates ferroptosis

Decrease levels of ACSL4 and TFR1 in the cortex that attenuates ferroptosis

Stimulated expression PGC-1 $\alpha$  and TFAM that are responsible for mitochondrial biogenesis mitochondrial and

Stimulated expression PGC-1 $\alpha$  and TFAM that are responsible for mitochondrial biogenesis mitochondrial and

Upregulated Akt activation by and suppressed cleaved caspase-3 expression.

Upregulation of PI3K, p55 $\gamma$  mRNA in vitro and in vivo



Upregulation of PI3K, p53 mRNA in vitro and in vivo

Infarct volume decreased, decreased brain edema and contributed to the restoration of motor function

Downregulation of pro-inflammatory cytokines (TNF $\alpha$  and IL-6)

Downregulation of pro-inflammatory cytokines (TNF $\alpha$  and IL-6)

Upregulation anti-inflammatory cytokines (IL-1 $\beta$ )

Minimal detection of CD68-positive activated macrophages/microglia

Upregulated Akt and ERK phosphorylation, and attenuated neutrophil migration, endothelium adhesion, spontaneous

Upregulated Akt and ERK phosphorylation, and attenuated neutrophil migration, endothelium adhesion, spontaneous

Reducing volume of infarction, neuronal loss and water content

The nNOS expression in cortex and dentate gyrus was reduced

Increased levels of NO, p-Akt/Akt, and p-eNOS/eNOS

Increased Bcl-2 expression

Increased Bcl-2 expression

Reduced Bax expression in the penumbra

Reduced Bax expression in the penumbra

Enhanced the expression of Bcl-2

Attenuated the content of Bax, cleaved caspase-3, and PARP

Attenuated the content of Bax, cleaved caspase-3, and PARP

Attenuated the content of Bax, cleaved caspase-3, and PARP

Brain water content increase, cerebral blood flow decrease, cerebral infarction and neurological deficits decreased

Inhibits the expression of MMP-2/9 and Src/MLCK/MLC signaling pathway to attenuated BBB injury.

Inhibits the expression of MMP-2/9 and Src/MLCK/MLC signaling pathway to attenuated BBB injury.

Increased mitochondrial respiration, prevented mitochondrial dysfunction by the increased the expression of PGC-1 $\alpha$

Decreased protein levels of TLR4, p-p38, and IL1

Decreased protein levels of TLR4, p-p38, and IL1

Decreased protein levels of TLR4, p-p38, and IL1

Upregulating p-Akt and p-mTOR expression

Upregulating p-Akt and p-mTOR expression

Attenuated neurological deficits, reduced cerebral infarction area and lowered brain water content

Reduced the expression of IL-1 $\beta$  and IL-8 and enhanced the expression of p-JAK2 and p-STAT3

Reduced the expression of IL-1 $\beta$  and IL-8 and enhanced the expression of p-JAK2 and p-STAT3

Reduced the expression of IL-1 $\beta$  and IL-8 and enhanced the expression of p-JAK2 and p-STAT3

Reduced the expression of IL-1 $\beta$  and IL-8 and enhanced the expression of p-JAK2 and p-STAT3

Upregulation of flotillin-1 protein level which decrease cell death, LDH release and caspase-3 activation

Upregulation of flotillin-1 protein level which decrease cell death, LDH release and caspase-3 activation

Upregulation of flotillin-1 protein level which decrease cell death, LDH release and caspase-3 activation

Reduced infarct volume, improved neurological function, alleviated the morphological damage of neurons, and

Increased Bcl-2 protein levels

Decreased Bax and caspase-3 expressions in mouse N2a cells

Decreased Bax and caspase-3 expressions in mouse N2a cells

Decreased the expression of LC3 II and HIF-1 $\alpha$

Decreased the expression of LC3 II and HIF-1 $\alpha$

Exhibited substantial reductions in neurological score and infarct area

Upregulated expression of the mitochondrial biogenesis regulators NRF-1 and TFAM

Upregulated expression of the mitochondrial biogenesis regulators NRF-1 and TFAM

Upregulated expression of the mitochondrial biogenesis regulators NRF-1 and TFAM

Upregulated expression of the mitochondrial biogenesis regulators NRF-1 and TFAM

Reduced astroglial and microglial activation associated with a decrease in cd11b immunoreactivity

Attenuated NF- $\kappa$ B levels and JNK activation; Pretreatment for 7 days before I/R decreased iNOS and COX-2 exp

Attenuated NF- $\kappa$ B levels and JNK activation; Pretreatment for 7 days before I/R decreased iNOS and COX-2 exp

Attenuated NF- $\kappa$ B levels and JNK activation; Pretreatment for 7 days before I/R decreased iNOS and COX-2 exp

Attenuated NF- $\kappa$ B levels and JNK activation; Pretreatment for 7 days before I/R decreased iNOS and COX-2 exp

Reduced the cerebral ischemia reperfusion damage, brain edema, and Evans blue dye extravasation

Downregulated MMP-9 expression

Upregulated TIMP-1 expression

Reduced cerebral infarct volume, decreased brain water content, and improved neurological scores

Upregulates Sirt1 expression and enhance autophagy activity

Reduce expression of protein levels of activated NLRP3 inflammasome (caspase-1, IL-1 $\beta$ , and IL-18)

Reduce expression of protein levels of activated NLRP3 inflammasome (caspase-1, IL-1 $\beta$ , and IL-18)

Reduce expression of protein levels of activated NLRP3 inflammasome (caspase-1, IL-1 $\beta$ , and IL-18)

Decreased expression of inflammatory cytokines including interleukin (IL)-1 $\beta$ , interleukin (IL)-6 and tumor necr

Decreased expression of inflammatory cytokines including interleukin (IL)-1 $\beta$ , interleukin (IL)-6 and tumor necr

Decreased expression of inflammatory cytokines including interleukin (IL)-1 $\beta$ , interleukin (IL)-6 and tumor necr

Reduced phosphorylation of p38, MAPK and Iba1 expression

Reduced phosphorylation of p38, MAPK and Iba1 expression

Reduced phosphorylation of p38, MAPK and Iba1 expression

Increase ilevels of Bax

Decreased levels of Bcl-2

Attenuated the upregulation of NR2B expression, a subunit of N-methyl-D-aspartate receptors and inhibited C

Reduced cerebral infarction and improved neurological function after cerebral ischemia

Reduced the expression of M1 microglia/macrophage markers (IL-1 $\beta$ , IL-6, TNF- $\alpha$ , IFN- $\gamma$ )

Reduced the expression of M1 microglia/macrophage markers (IL-1 $\beta$ , IL-6, TNF- $\alpha$ , IFN- $\gamma$ )

Reduced the expression of M1 microglia/macrophage markers (IL-1 $\beta$ , IL-6, TNF- $\alpha$ , IFN- $\gamma$ )

Reduced the expression of M1 microglia/macrophage markers (IL-1 $\beta$ , IL-6, TNF- $\alpha$ , IFN- $\gamma$ )

Increased the expression of M2 microglia/macrophage markers after stroke (IL-10, TGF $\beta$ )

Increased the expression of M2 microglia/macrophage markers after stroke (IL-10, TGF $\beta$ )

Reduced the secretion of the pro-inflammatory cytokines, IL-1 $\beta$ , IL-2, IL-6, IL-8, and TNF $\alpha$  in M1 microglia

Reduced the secretion of the pro-inflammatory cytokines, IL-1 $\beta$ , IL-2, IL-6, IL-8, and TNF $\alpha$  in M1 microglia

Reduced the secretion of the pro-inflammatory cytokines, IL-1 $\beta$ , IL-2, IL-6, IL-8, and TNF $\alpha$  in M1 microglia

Reduced the secretion of the pro-inflammatory cytokines, IL-1 $\beta$ , IL-2, IL-6, IL-8, and TNF $\alpha$  in M1 microglia

Reduced the secretion of the pro-inflammatory cytokines, IL-1 $\beta$ , IL-2, IL-6, IL-8, and TNF $\alpha$  in M1 microglia

Increased viability, inhibited lactate dehydrogenase (LDH) release, and reduced apoptosis in OGD/R-induced B'

Reduce levels of TNF- $\alpha$ , IL-6 and IL-8

Reduce levels of TNF- $\alpha$ , IL-6 and IL-8

Reduce levels of TNF- $\alpha$ , IL-6 and IL-8

Reduce NF $\kappa$ B p50 subunit, IL-6, and TNF $\alpha$  expression

Reduce NF $\kappa$ B p50 subunit, IL-6, and TNF $\alpha$  expression

Reduce NF $\kappa$ B p50 subunit, IL-6, and TNF $\alpha$  expression

Increase NeuN expression

Decreased levels of NLRP3, ASC, cleaved- caspase-1 and IL-1 $\beta$ , and decreased the expression of P62

Decreased levels of NLRP3, ASC, cleaved- caspase-1 and IL-1 $\beta$ , and decreased the expression of P62

Decreased levels of NLRP3, ASC, cleaved- caspase-1 and IL-1 $\beta$ , and decreased the expression of P62

Decreased levels of NLRP3, ASC, cleaved- caspase-1 and IL-1 $\beta$ , and decreased the expression of P62

Decreased levels of NLRP3, ASC, cleaved- caspase-1 and IL-1 $\beta$ , and decreased the expression of P62

protected the tMCAO animals against vascular remodelling and controled hemorrhagic lesion

Medium and high doses of geniposide attenuated oxidative stress insult and improved iLTP

Increased the activity superoxide dismutase (SOD) and decresed malondialdehyde (MDA) content and plasma l

Increased the activity superoxide dismutase (SOD) and decresed malondialdehyde (MDA) content and plasma l

Increased the activity superoxide dismutase (SOD) and decresed malondialdehyde (MDA) content and plasma l

Down-regulate the expressions of TLR4, NFkappaB and TNFalpha

Down-regulate the expressions of TLR4, NFkappaB and TNFalpha

Down-regulate the expressions of TLR4, NFkappaB and TNFalpha

Inhibit caspase-3 expression and reduce PARP degradation after cerebral ischemic

Decrease levels of pMEK1/2, pERK1/2, and COX2 downregulated expression

Decrease levels of pMEK1/2, pERK1/2, and COX2 downregulated expression

Decrease levels of pMEK1/2, pERK1/2, and COX2 downregulated expression

Decrease levels of pMEK1/2, pERK1/2, and COX2 downregulated expression

Decrease levels of pMEK1/2, pERK1/2, and COX2 downregulated expression

Decrease levels of pMEK1/2, pERK1/2, and COX2 downregulated expression

Decrease levels of pMEK1/2, pERK1/2, and COX2 downregulated expression

Decrease levels of pMEK1/2, pERK1/2, and COX2 downregulated expression

Decrease levels of pMEK1/2, pERK1/2, and COX2 downregulated expression

Decrease levels of pMEK1/2, pERK1/2, and COX2 downregulated expression

Decrease levels of pMEK1/2, pERK1/2, and COX2 downregulated expression

Decrease levels of pMEK1/2, pERK1/2, and COX2 downregulated expression

Decrease levels of pMEK1/2, pERK1/2, and COX2 downregulated expression

Decrease levels of pMEK1/2, pERK1/2, and COX2 downregulated expression

Decrease levels of pMEK1/2, pERK1/2, and COX2 downregulated expression

Decrease levels of pMEK1/2, pERK1/2, and COX2 downregulated expression

Decrease levels of pMEK1/2, pERK1/2, and COX2 downregulated expression

Decrease levels of pMEK1/2, pERK1/2, and COX2 downregulated expression

Decrease levels of pMEK1/2, pERK1/2, and COX2 downregulated expression

Decrease levels of pMEK1/2, pERK1/2, and COX2 downregulated expression

Decrease levels of pMEK1/2, pERK1/2, and COX2 downregulated expression

Decrease levels of pMEK1/2, pERK1/2, and COX2 downregulated expression

Decrease levels of pMEK1/2, pERK1/2, and COX2 downregulated expression

Decrease levels of pMEK1/2, pERK1/2, and COX2 downregulated expression

Decrease levels of pMEK1/2, pERK1/2, and COX2 downregulated expression

Decrease levels of pMEK1/2, pERK1/2, and COX2 downregulated expression

Decrease levels of pMEK1/2, pERK1/2, and COX2 downregulated expression

Decrease levels of pMEK1/2, pERK1/2, and COX2 downregulated expression

Decrease levels of pMEK1/2, pERK1/2, and COX2 downregulated expression

Decrease levels of pMEK1/2, pERK1/2, and COX2 downregulated expression

Decrease levels of pMEK1/2, pERK1/2, and COX2 downregulated expression

Decrease levels of pMEK1/2, pERK1/2, and COX2 downregulated expression

Decrease levels of pMEK1/2, pERK1/2, and COX2 downregulated expression

Decrease levels of pMEK1/2, pERK1/2, and COX2 downregulated expression

Decrease levels of pMEK1/2, pERK1/2, and COX2 downregulated expression

Decrease levels of pMEK1/2, pERK1/2, and COX2 downregulated expression

Increase protein level of apoptosis cytokines Caspase-8, Bid, cleaved Caspase-3 and Cyto C

Increase protein level of apoptosis cytokines Caspase-8, Bid, cleaved Caspase-3 and Cyto C

Reduced the cerebral infarct volume and the neurological deficit score

Reduced the protein levels of NLRP3, Caspase-1, IL-1 $\beta$ , GSDMD, and GSDMD-N, inhibiting NLRP3 inflammasom

Reduced the protein levels of NLRP3, Caspase-1, IL-1 $\beta$ , GSDMD, and GSDMD-N, inhibiting NLRP3 inflammasom

Reduced the protein levels of NLRP3, Caspase-1, IL-1 $\beta$ , GSDMD, and GSDMD-N, inhibiting NLRP3 inflammasom

Reduced the protein levels of NLRP3, Caspase-1, IL-1 $\beta$ , GSDMD, and GSDMD-N, inhibiting NLRP3 inflammasom

Reduced the protein levels of NLRP3, Caspase-1, IL-1 $\beta$ , GSDMD, and GSDMD-N, inhibiting NLRP3 inflammasom

Reduce the severity of neurological deficits, infarct volumes, cerebral edema, and neuronal death

Reduce the level of cleaved caspase-3 and Increase the Bcl-2/Bax ratio

Reduce the level of cleaved caspase-3 and Increase the Bcl-2/Bax ratio

Reduce the level of cleaved caspase-3 and Increase the Bcl-2/Bax ratio

Reduces NOX2 and iNOS expression by impairing PI3K/AKT-dependent NF- $\kappa$ B and HIF-1  $\alpha$  activation

Reduces NOX2 and iNOS expression by impairing PI3K/AKT-dependent NF- $\kappa$ B and HIF-1  $\alpha$  activation

Induced CEC apoptosis and caspase-3 activation

Increased Nrf2-HO-1 expression through p38 MAPK regulation

Decreased the expression of GFAP

Increased the expression of NeuN

Decreased the levels of pro-inflammatory cytokines (IL-1 $\beta$ , IL-6 and TNF- $\alpha$ )

Decreased the levels of pro-inflammatory cytokines (IL-1 $\beta$ , IL-6 and TNF- $\alpha$ )

Decreased the levels of pro-inflammatory cytokines (IL-1 $\beta$ , IL-6 and TNF- $\alpha$ )

Reduced infarct volume, ameliorated the neurological deficit and the permeability of BBB

Decresed the content of IL-6, IL-1beta in serum and TNF-alpha

Decresed the content of IL-6, IL-1beta in serum and TNF-alpha

Decresed the content of IL-6, IL-1beta in serum and TNF-alpha

Upregulated the protein levels of HO-1, Nqo1, SOD, p-Akt, p-Nrf2, SOD, and Nrf2

The infarct volume ratios in MCAO rats were dramatically decreased by GB in a dose-dependent

Upregulated the protein levels of HO-1, Nqo1, SOD, p-Akt, p-Nrf2, SOD, and Nrf2

Upregulated the protein levels of HO-1, Nqo1, SOD, p-Akt, p-Nrf2, SOD, and Nrf3

Upregulated the protein levels of HO-1, Nqo1, SOD, p-Akt, p-Nrf2, SOD, and Nrf4

Upregulated the protein levels of HO-1, Nqo1, SOD, p-Akt, p-Nrf2, SOD, and Nrf5

Upregulated the protein levels of HO-1, Nqo1, SOD, p-Akt, p-Nrf2, SOD, and Nrf6

Upregulated the protein levels of HO-1, Nqo1, SOD, p-Akt, p-Nrf2, SOD, and Nrf7

Decreased rat neurological deficit scores, reduced brain infarct volume

Reduced the ratio of Bax/Bcl-2 in the I/R group

Reduced the ratio of Bax/Bcl-2 in the I/R group

Reduced infarct size and brain edema, improved neurological deficit score and inhibit platelet aggregation and

Decreasing lactate dehydrogenase (LDH) activity, and inhibiting IL-1 $\beta$  and TNF- $\alpha$  releasing associated with the c

Decreasing lactate dehydrogenase (LDH) activity, and inhibiting IL-1 $\beta$  and TNF- $\alpha$  releasing associated with the c

Decreasing lactate dehydrogenase (LDH) activity, and inhibiting IL-1 $\beta$  and TNF- $\alpha$  releasing associated with the c

Reduced the brain infarct and edema, attenuated the neuro-behavioral dysfunction, and improved cell morpho

Decreased expression of bcl-2, and bax via activating PI3K/Akt signaling pathway

Decreased expression of bcl-2, and bax via activating PI3K/Akt signaling pathway

Inhibits overproduction of ROS and iNOS/NO and decreased TNF-alpha levels

Inhibits overproduction of ROS and iNOS/NO and decreased TNF-alpha levels

Inhibits overproduction of ROS and iNOS/NO and decreased TNF-alpha levels

Inhibits overproduction of ROS and iNOS/NO and decreased TNF- $\alpha$  levels

Increased serum VEGF levels and decreased serum TNF- $\alpha$  levels

Increased serum VEGF levels and decreased serum TNF- $\alpha$  levels

Ameliorated neurological deficits

Reducing the Bax/Bcl-2 ratio

Reducing the Bax/Bcl-2 ratio

Reducing the Bax/Bcl-2 ratio

Reducing the Bax/Bcl-2 ratio

Reduce the gene and protein levels of Apaf-1, Bad and Caspase-3 and increase the expression of Bcl-2

Reduce the gene and protein levels of Apaf-1, Bad and Caspase-3 and increase the expression of Bcl-2

Reduce the gene and protein levels of Apaf-1, Bad and Caspase-3 and increase the expression of Bcl-2

Increase the expression of Bcl-2

Reduce the gene and protein levels of Apaf-1, Bad and Caspase-3 and increase the expression of Bcl-2

Reduce the gene and protein levels of Apaf-1, Bad and Caspase-3 and increase the expression of Bcl-2

Reduce the gene and protein levels of Apaf-1, Bad and Caspase-3 and increase the expression of Bcl-2

Increase the expression of Bcl-2

Improved neurological deficits, infarct volume, and brain edema

Reduced the cleaved Caspase-3 level but enhanced the phosphorylation of Akt, BAD and mTOR

Enhanced the expression of BDNF and CREB significantly

Enhanced the expression of BDNF and CREB significantly

Exposure of glutamate-treated cells to emodin induced an increase in the level of Bcl-2 expression

Increase in the level of Bcl-2 expression

Reduce expression of Bax and active caspase-3 proteins

Reduced infarct volume and cell death

Reduced reactive oxygen species (ROS) production and glutamate release

Increased glutamate transporter-1 (GLT-1) expression and reduce glutamate release

Increased Bcl-2 expression

Prevent postischemic neuronal degeneration and brain slice injury

Decrease the extracellular level of glutamate and aspartate significantly

Decrease the extracellular level of glutamate and aspartate significantly

Decrease the level of malondialdehyde (MDA) and Increase the activity of superoxide dismutase (SOD)

Inhibit expression of matrix metalloproteinase-3(MMP-3)

Prevented the reduction on adenosine A1 receptor level caused by ischemia

Ameliorated long-term neurological deficits and reduced neuronal tissue loss

Inhibited microglia/macrophage pro-inflammatory polarization by downregulated of CD16/Iba1

Inhibited microglia/macrophage pro-inflammatory polarization by downregulated of CD16/Iba1

Inhibits the expression of inflammatory mediators (TNF- $\alpha$ , IL-1 $\beta$ , and CCL3) and suppressed the activities of MN

Inhibits the expression of inflammatory mediators (TNF- $\alpha$ , IL-1 $\beta$ , and CCL3) and suppressed the activities of MN

Inhibits the expression of inflammatory mediators (TNF- $\alpha$ , IL-1 $\beta$ , and CCL3) and suppressed the activities of MN

Reduced the neurological deficits and infarct volume

Decreased the levels of inflammation-associated cytokines IL-1 $\beta$ , IL-6, myeloperoxidase (MPO), and TNF- $\alpha$

Decreased the levels of inflammation-associated cytokines IL-1 $\beta$ , IL-6, myeloperoxidase (MPO), and TNF- $\alpha$

Decreased the levels of inflammation-associated cytokines IL-1 $\beta$ , IL-6, myeloperoxidase (MPO), and TNF- $\alpha$

Decreased the levels of inflammation-associated cytokines IL-1 $\beta$ , IL-6, myeloperoxidase (MPO), and TNF- $\alpha$

Decreased the levels of oxidative stress-related proteins (MDA and SOD)

Decreased the levels of oxidative stress-related proteins (MDA and SOD)

Decreased the levels of apoptosis-related proteins (p-53, Bax, and B-cell lymphoma (Bcl)-2)

Decreased the levels of apoptosis-related proteins (p-53, Bax, and B-cell lymphoma (Bcl)-2)

Decreased the levels of apoptosis-related proteins (p-53, Bax, and B-cell lymphoma (Bcl)-2)

Reduce oxidative stress indicators (dihydroethidium, 8-hydroxyguanine and 4-hydroxy-2-nonenal) and antioxidant

Reduce oxidative stress indicators (dihydroethidium, 8-hydroxyguanine and 4-hydroxy-2-nonenal) and antioxidant

Reduce oxidative stress indicators (dihydroethidium, 8-hydroxyguanine and 4-hydroxy-2-nonenal) and antioxidant

Reduce oxidative stress indicators (dihydroethidium, 8-hydroxyguanine and 4-hydroxy-2-nonenal) and antioxidant

Inhibited activations of astrocytes and microglia (GFAP) in the ischemic CA1 area

Reduced the increased 4-hydroxy-2-nonenal and superoxide anion radical production and increased expressions

Reduced the increased 4-hydroxy-2-nonenal and superoxide anion radical production and increased expressions

Reduced the increased 4-hydroxy-2-nonenal and superoxide anion radical production and increased expressions

Reduced the increased 4-hydroxy-2-nonenal and superoxide anion radical production and increased expressions

Attenuated ischemia-induced memory deficits

Increased BDNF levels and attenuated hippocampal CA1 neurodegeneration and

Reduced brain infarct volume ) and lessened the extent of histological damage

Decrease in hippocampal neurodegeneration

Prevented the cognitive and emotional impairments

Decreases hippocampal neuroinflammation by downregulated Iba-1 (microglia) and GFAP (astrocytes)

Decreases hippocampal neuroinflammation by downregulated Iba-1 (microglia) and GFAP (astrocytes)

Increase in the hippocampal brain derived neurotrophic factor (BDNF) protein levels

Reduced the infarction area, neurological deficit score

Reduced protein expression of iNOS and COX-2, and attenuated inhibition of p53 protein

Reduced protein expression of iNOS and COX-2, and attenuated inhibition of p53 protein

Reduced protein expression of iNOS and COX-2, and attenuated inhibition of p53 protein

Reduced protein expression of iNOS and COX-2, and attenuated inhibition of p53 protein

Reduced protein expression of iNOS and COX-2, and attenuated inhibition of p53 protein

Reduced mRNA expression of iNOS, COX-2, and TNF $\alpha$ .

Reduced mRNA expression of iNOS, COX-2, and TNF $\alpha$ .

Reduced mRNA expression of iNOS, COX-2, and TNF $\alpha$ .

| <b>Target</b>       | <b>Protein level</b>     |
|---------------------|--------------------------|
| Caspase-3           | Decrease protein levels  |
| Caspase-3           | -                        |
| BDNF                | Increase Preotein levels |
| BDNF                | -                        |
| CaMKII              | Decrease protein levels  |
| GABA(A)R $\alpha$ 1 | Increase Preotein levels |
| GABA(A)R $\gamma$ 2 | Increase Preotein levels |
| KCC2                | Increase Preotein levels |
| GABA(A)R $\alpha$ 1 | -                        |
| GABA(A)R $\gamma$ 2 | -                        |
| KCC2                | -                        |
| NKCC1               | Decrease protein levels  |
| NKCC1               | -                        |
| PI3K                | Increase Preotein levels |
| Akt                 | Increase Preotein levels |
| BDNF                | Increase Preotein levels |
| BCL-2               | Increase Preotein levels |
| MCL-1               | Increase Preotein levels |
| MCL-1               | -                        |
| MCL-1               | -                        |
| IL-6                | Decrease protein levels  |
| IL-18               | Decrease protein levels  |
| TNF- $\alpha$       | Decrease protein levels  |
| BCL-2               | Increase Preotein levels |
| Bax                 | Decrease protein levels  |
| Caspase-3           | Decrease protein levels  |
| PI3K                | Increase Preotein levels |
| Akt                 | Increase Preotein levels |
| mTOR                | Increase Preotein levels |
| MAP-2               | Increase Preotein levels |
| BDNF                | Increase Preotein levels |
| NT-3                | Increase Preotein levels |
| IGF-1               | Increase Preotein levels |
| iNOS                | Decrease protein levels  |
| TNF- $\alpha$       | Decrease protein levels  |
| IL-1 $\beta$        | Decrease protein levels  |
| p-JNK               | Decrease protein levels  |
| p-p38               | Decrease protein levels  |
| NO                  | Decrease protein levels  |
| TNF- $\alpha$       | Decrease protein levels  |
| IL-1 $\beta$        | Decrease protein levels  |
| ROS                 | Decrease protein levels  |
| NO                  | -                        |
| TNF- $\alpha$       | -                        |
| IL-1 $\beta$        | -                        |
| ROS                 | -                        |

|                |                         |
|----------------|-------------------------|
| Glu            | Decrease protein levels |
| Asp            | Decrease protein levels |
| Gly            | Decrease protein levels |
| GABA           | Decrease protein levels |
| Tau            | Decrease protein levels |
| LDH            | Decrease protein levels |
| Caspase-3      | Decrease protein levels |
| iNOS           | Decrease protein levels |
| -              | -                       |
| Ki-67          | Increase Protein levels |
| BCL-2          | Increase Protein levels |
| Caspase-3      | Increase Protein levels |
| Bax            | Increase Protein levels |
| IL-10          | Increase Protein levels |
| IL-6           | Decrease protein levels |
| TNF- $\alpha$  | Decrease protein levels |
| Ulk1           | Increase Protein levels |
| mTOR           | Increase Protein levels |
| PPAR- $\gamma$ | Increase Protein levels |
| Caspase-3      | -                       |
| BCL-2          | -                       |
| Caveolin-1-KD  | -                       |
| VEGFR2         | Increase Protein levels |
| CD34           | Increase Protein levels |
| H3             | -                       |
| H4             | -                       |
| Syn-I          | -                       |
| HDAC           | Decrease protein levels |
| BDNF           | Increase Protein levels |
| IL-1 $\beta$   | Decrease protein levels |
| TGF- $\beta$ 1 | Decrease protein levels |
| -              | -                       |
| IL-1 $\beta$   | Decrease protein levels |
| TGF- $\beta$ 1 | Decrease protein levels |
| PPAR $\alpha$  | Increase Protein levels |
| PPAR $\gamma$  | Increase Protein levels |
| IL-1 $\beta$   | Decrease protein levels |
| IL-6           | Decrease protein levels |
| TNF- $\alpha$  | Decrease protein levels |
| XBP1u          | Decrease protein levels |
| Caspase-3      | Decrease protein levels |
| XBP1s          | Decrease protein levels |
| IL-1 $\beta$   | -                       |
| IL-6           | -                       |
| TNF- $\alpha$  | -                       |
| XBP1u          | -                       |



|                 |                         |
|-----------------|-------------------------|
| Caspase-3       | -                       |
| XBP1s           | -                       |
| p-IRE1 $\alpha$ | Decrease protein levels |
| p-IRE1 $\alpha$ | -                       |
| -               | -                       |
| TNF- $\alpha$   | Decrease protein levels |
| IL-6            | Decrease protein levels |
| Caspase-3       | Decrease protein levels |
| Bax             | Decrease protein levels |
| TNF- $\alpha$   | -                       |
| IL-6            | -                       |
| Caspase-3       | -                       |
| Bax             | -                       |
| BCL-2           | Increase Protein levels |
| -               | -                       |
| Caspase-3       | Decrease protein levels |
| Caspase-3       | -                       |
| -               | -                       |
| ROS             | Decrease protein levels |
| MDA             | Decrease protein levels |
| Caspase-3       | Decrease protein levels |
| BCL-2           | Increase Protein levels |
| -               | -                       |
| 4-HNE           | Decrease protein levels |
| BDNF            | Increase Protein levels |
| TrkB            | Increase Protein levels |
| -               | -                       |
| p62             | -                       |
| NBR1            | -                       |
| BCL-2           | -                       |
| TNF- $\alpha$   | Decrease protein levels |
| -               | -                       |
| -               | -                       |
| Mfn-2           | Decrease protein levels |
| BCL-2           | Decrease protein levels |
| Apaf-1          | Decrease protein levels |
| -               | -                       |
| TNF- $\alpha$   | Decrease protein levels |
| IL-1 $\beta$    | Decrease protein levels |
| IL-6            | Decrease protein levels |
| ACSL4           | Decrease protein levels |
| TFR1            | Decrease protein levels |
| PGC-1 $\alpha$  | -                       |
| TFAM            | -                       |
| Caspase-3       | Decrease protein levels |
| PI3K            | -                       |

|                |                         |
|----------------|-------------------------|
| p53            | -                       |
| -              | -                       |
| TNF- $\alpha$  | Decrease protein levels |
| IL-6           | Decrease protein levels |
| IL-1 $\beta$   | Increase protein levels |
| CD68           | Decrease protein levels |
| Akt            | Increase protein levels |
| ERK            | Increase protein levels |
| -              | -                       |
| nNOS           | Decrease protein levels |
| NO             | Increase protein levels |
| p-Akt          | Increase protein levels |
| Akt            | Increase protein levels |
| p-eNOS         | Increase protein levels |
| eNOS           | Increase protein levels |
| BCL-2          | Increase protein levels |
| BCL-2          | -                       |
| Bax            | Decrease protein levels |
| Bax            | -                       |
| BCL-2          | Increase protein levels |
| Bax            | Decrease protein levels |
| Caspase-3      | Decrease protein levels |
| PARP           | Decrease protein levels |
| -              | -                       |
| MMP-2          | Decrease protein levels |
| MMP-9          | Decrease protein levels |
| Nrf2           | Increase protein levels |
| TLR4           | Decrease protein levels |
| p-p38          | Decrease protein levels |
| IL-1           | Decrease protein levels |
| p-Akt          | Increase protein levels |
| p-mTOR         | Increase protein levels |
| -              | -                       |
| IL-1 $\beta$   | Decrease protein levels |
| IL-8           | Decrease protein levels |
| p-JAK2         | Increase protein levels |
| p-STAT3        | Increase protein levels |
| Flotillin-1    | Increase protein levels |
| LDH            | Increase protein levels |
| Caspase-3      | Increase protein levels |
| -              | -                       |
| BCL-2          | Increase protein levels |
| Caspase-3      | Decrease protein levels |
| Caspase-3      | Decrease protein levels |
| LC3 II         | Decrease protein levels |
| HIF-1 $\alpha$ | Decrease protein levels |

|           |                         |
|-----------|-------------------------|
| -         | -                       |
| NRF2      | Increase protein levels |
| TFAM      | Increase protein levels |
| NRF2      | -                       |
| TFAM      | -                       |
| CD11b     | -                       |
| NF-κB     | Decrease protein levels |
| JNK       | Decrease protein levels |
| iNOS      | Decrease protein levels |
| COX-2     | Decrease protein levels |
| -         | -                       |
| MMP-9     | Decrease protein levels |
| TIMP-1    | Increase protein levels |
| -         | -                       |
| Sirt1     | Increase protein levels |
| Caspase-3 | Decrease protein levels |
| IL-1β     | Decrease protein levels |
| IL-1β     | Decrease protein levels |
| IL-1β     | -                       |
| IL-6      | -                       |
| TNF-α     | -                       |
| p38       | Decrease protein levels |
| MAPK      | Decrease protein levels |
| Iba1      | Decrease protein levels |
| Bax       | Increase protein levels |
| BCL-2     | Decrease protein levels |
| NR2B      | Decrease protein levels |
| -         | -                       |
| IL-1β     | -                       |
| IL-6      | -                       |
| TNF-α     | -                       |
| IFN-γ     | -                       |
| IL-10     | -                       |
| TGFβ      | -                       |
| IL-1β     | Decrease protein levels |
| IL-6      | Decrease protein levels |
| IL-2      | Decrease protein levels |
| IL-8      | Decrease protein levels |
| TNF-α     | Decrease protein levels |
| LDH       | Decrease protein levels |
| TNF-α     | Decrease protein levels |
| IL-6      | Decrease protein levels |
| IL-8      | Decrease protein levels |
| NF-κB     | Decrease protein levels |
| IL-6      | Decrease protein levels |
| TNF-α     | Decrease protein levels |

|                |                         |
|----------------|-------------------------|
| NeuN           | Increase protein levels |
| NLRP3          | Decrease protein levels |
| ASC            | Decrease protein levels |
| Caspase-3      | Decrease protein levels |
| IL-1 $\beta$   | Decrease protein levels |
| p62            | Decrease protein levels |
| -              | -                       |
| -              | -                       |
| SOD            | Increase protein levels |
| MDA            | Decrease protein levels |
| ET-1           | Decrease protein levels |
| TNF- $\alpha$  | Decrease protein levels |
| NF- $\kappa$ B | Decrease protein levels |
| TLR4           | Decrease protein levels |
| Caspase-3      | Decrease protein levels |
| p-MEK1         | Decrease protein levels |
| p-MEK2         | Decrease protein levels |
| p-ERK1         | Decrease protein levels |
| p-ERK2         | Decrease protein levels |
| COX-2          | Decrease protein levels |
| p-MEK1         | -                       |
| p-MEK2         | -                       |
| p-ERK1         | -                       |
| p-ERK2         | -                       |
| COX-2          | -                       |
| -              | -                       |
| Caspase-3      | Decrease protein levels |
| Caspase-3      | Decrease protein levels |
| Caspase-3      | Decrease protein levels |
| p-ERK1         | Increase protein levels |
| p-ERK2         | Increase protein levels |
| p-JNK          | Increase protein levels |
| IL-1 $\beta$   | Decrease protein levels |
| MDA            | Decrease protein levels |
| SOD            | Increase protein levels |
| Survivin       | Increase protein levels |
| -              | -                       |
| ICAM-1         | Decrease protein levels |
| TLR4           | Decrease protein levels |
| Fas            | -                       |
| FasL           | -                       |
| Caspase-8      | -                       |
| Bax            | -                       |
| BCL-2          | -                       |
| Caspase-8      | Increase protein levels |
| Bid            | Increase protein levels |

|               |                         |
|---------------|-------------------------|
| Caspase-3     | Increase protein levels |
| Cyto C        | Increase protein levels |
| -             | -                       |
| NLRP3         | Decrease protein levels |
| Caspase-1     | Decrease protein levels |
| IL-1 $\beta$  | Decrease protein levels |
| GSDMD         | Decrease protein levels |
| GSDMD-N       | Decrease protein levels |
| -             | -                       |
| Caspase-3     | Decrease protein levels |
| BCL-2         | Decrease protein levels |
| Bax           | Decrease protein levels |
| NOX2          | Decrease protein levels |
| iNOS          | Decrease protein levels |
| Caspase-3     | -                       |
| NRF2          | Increase protein levels |
| GFAP          | Decrease protein levels |
| NeuN          | Increase protein levels |
| IL-1 $\beta$  | Decrease protein levels |
| IL-6          | Decrease protein levels |
| TNF- $\alpha$ | Decrease protein levels |
| -             | -                       |
| IL-6          | Decrease protein levels |
| IL-1 $\beta$  | Decrease protein levels |
| TNF- $\alpha$ | Decrease protein levels |
| SOD           | Increase protein levels |
| -             | -                       |
| HO-1          | Increase protein levels |
| Nqo1          | Increase protein levels |
| SOD           | Increase protein levels |
| p-Akt         | Increase protein levels |
| p-Nrf2        | Increase protein levels |
| Nrf2          | Increase protein levels |
| -             | -                       |
| Bax           | Decrease protein levels |
| BCL-2         | Decrease protein levels |
| -             | -                       |
| TNF- $\alpha$ | Decrease protein levels |
| IL-1 $\beta$  | Decrease protein levels |
| LDH           | Decrease protein levels |
| -             | -                       |
| Bax           | Decrease protein levels |
| BCL-2         | Decrease protein levels |
| ROS           | Decrease protein levels |
| NO            | Decrease protein levels |
| iNOS          | Decrease protein levels |

|               |                         |
|---------------|-------------------------|
| TNF- $\alpha$ | Decrease protein levels |
| VEGF          | Increase protein levels |
| TNF- $\alpha$ | Decrease protein levels |
| -             | -                       |
| Bax           | Decrease protein levels |
| BCL-2         | Decrease protein levels |
| Bax           | -                       |
| BCL-2         | -                       |
| Apaf-1        | Decrease protein levels |
| Bad           | Decrease protein levels |
| Caspase-3     | Decrease protein levels |
| BCL-2         | Increase protein levels |
| Apaf-1        | -                       |
| Bad           | -                       |
| Caspase-3     | -                       |
| BCL-2         | -                       |
| -             | -                       |
| Caspase-3     | Decrease protein levels |
| BDNF          | Increase protein levels |
| CREB          | Increase protein levels |
| BCL-2         | Decrease protein levels |
| BCL-2         | Increase protein levels |
| Bax           | Decrease protein levels |
| -             | -                       |
| ROS           | -                       |
| GLT-1         | Increase protein levels |
| BCL-2         | Increase protein levels |
| -             | -                       |
| Glu           | Decrease protein levels |
| Asp           | Decrease protein levels |
| MDA           | Decrease protein levels |
| MMP-3         | Decrease protein levels |
| -             | -                       |
| -             | -                       |
| CD16          | -                       |
| Iba1          | -                       |
| TNF- $\alpha$ | -                       |
| IL-1 $\beta$  | -                       |
| CCL3          | -                       |
| -             | -                       |
| IL-1 $\beta$  | Decrease protein levels |
| IL-6          | Decrease protein levels |
| MPO           | Decrease protein levels |
| TNF- $\alpha$ | Decrease protein levels |
| MDA           | Decrease protein levels |
| SOD           | Decrease protein levels |

|                     |                         |
|---------------------|-------------------------|
| p53                 | Decrease protein levels |
| Bax                 | Decrease protein levels |
| BCL-2               | Decrease protein levels |
| Dihydroethidium     | Decrease protein levels |
| 8-hydroxyguanine    | Decrease protein levels |
| 4-hydroxy-2-nonenal | Decrease protein levels |
| SOD1                | Decrease protein levels |
| SOD2                | Decrease protein levels |
| GFAP                | Decrease protein levels |
| 4-hydroxy-2-nonenal | Decrease protein levels |
| Superoxide          | Decrease protein levels |
| SOD1                | Increase protein levels |
| SOD2                | Increase protein levels |
| -                   | -                       |
| BDNF                | Increase protein levels |
| -                   | -                       |
| -                   | -                       |
| -                   | -                       |
| Iba1                | Decrease protein levels |
| GFAP                | Decrease protein levels |
| BDNF                | Increase protein levels |
| -                   | -                       |
| iNOS                | Decrease protein levels |
| COX-2               | Decrease protein levels |
| p53                 | Increase protein levels |
| iNOS                | -                       |
| COX-2               | -                       |
| p53                 | -                       |
| iNOS                | Decrease protein levels |
| COX-2               | Decrease protein levels |
| TNF- $\alpha$       | Decrease protein levels |

**Method**

Western blot

-

Western blot

-

Western blotting

Western blot

Western blot

Western blot

-

-

-

Western blot

-

Western blot

Western blot

ELISA

Western blot

Western blot

-

-

ELISA

ELISA

ELISA

Western blot

Western blot

Western blot

Western blotting

Western blot

Western blot

Western blot

Western blot / Immunofluorescence

Western blot / Immunofluorescence

Western blotting

Western blotting

Western blotting

Western blotting

-

-

-

-

**RNA expression**

-

Downregulated RNA expression

-

Upregulated RNA expression

-

-

-

-

Upregulated RNA expression

Upregulated RNA expression

Upregulated RNA expression

-

Downregulated RNA expression

-

-

-

-

-

Upregulated RNA expression

Upregulated RNA expression

-

-

-

-

-

-

-

-

-

-

-

-

-

-

-

-

-

-

-

-

-

-

-

-

-

Downregulated RNA expression

Downregulated RNA expression

Downregulated RNA expression

Downregulated RNA expression



|                                   |                              |
|-----------------------------------|------------------------------|
| UPLC–MS/MS MRM chromatograms      | -                            |
| Western blot                      | -                            |
| Western blot                      | -                            |
| ELISA                             | -                            |
| -                                 | -                            |
| Western blot / Immunochemistry    | -                            |
| ELISA                             | -                            |
| ELISA                             | -                            |
| ELISA                             | -                            |
| Western blot / Immunofluorescence | -                            |
| Western blot / Immunofluorescence | -                            |
| Western blot / Immunofluorescence | -                            |
| -                                 | Upregulated RNA expression   |
| -                                 | Downregulated RNA expression |
| -                                 | Downregulated RNA expression |
| Immunofluorescence                | -                            |
| Immunofluorescence                | -                            |
| -                                 | Upregulated RNA expression   |
| -                                 | Upregulated RNA expression   |
| -                                 | Upregulated RNA expression   |
| ELISA                             | -                            |
| Western blot                      | -                            |
| Western blot                      | -                            |
| Western blot                      | -                            |
| -                                 | -                            |
| Western blot                      | -                            |
| ELISA                             | -                            |
| -                                 | Downregulated RNA expression |

|                                         |                              |
|-----------------------------------------|------------------------------|
| -                                       | Downregulated RNA expression |
| -                                       | Downregulated RNA expression |
| Western blot                            | -                            |
| -                                       | Downregulated RNA expression |
| -                                       | -                            |
| Western blot                            | -                            |
| -                                       | Downregulated RNA expression |
| Western blot                            | Upregulated RNA expression   |
| -                                       | -                            |
| Western blot                            | -                            |
| -                                       | Downregulated RNA expression |
| -                                       | -                            |
| Western blot                            | -                            |
| -                                       | -                            |
| Immunochemistry                         | -                            |
| Western Blotting / ELISA                | -                            |
| Western Blotting / ELISA                | -                            |
| -                                       | -                            |
| -                                       | Upregulated RNA expression   |
| -                                       | Upregulated RNA expression   |
| -                                       | Upregulated RNA expression   |
| Western blotting / Immunohistochemistry | -                            |
| -                                       | -                            |
| -                                       | -                            |
| Western Blot                            | -                            |
| Western Blot                            | -                            |
| Western Blot                            | -                            |
| -                                       | -                            |
| ELISA                                   | -                            |
| ELISA                                   | -                            |
| ELISA                                   | -                            |
| Western blotting                        | -                            |
| Western blotting                        | -                            |
| -                                       | Upregulated RNA expression   |
| -                                       | Upregulated RNA expression   |
| Western Blot                            | -                            |
| -                                       | Upregulated RNA expression   |

|                                    |                              |
|------------------------------------|------------------------------|
| -                                  | Upregulated RNA expression   |
| -                                  | -                            |
| Immunohistochemistry               | -                            |
| -                                  | -                            |
| Immunohistochemistry               | -                            |
| Western blot                       | -                            |
| Western Blot / immunochemistry     | -                            |
| -                                  | Upregulated RNA expression   |
| Western Blot / immunochemistry     | -                            |
| -                                  | Downregulated RNA expression |
| Western Blot / immunochemistry     | -                            |
| -                                  | -                            |
| Western blot / confocal microscopy | -                            |
| Western blot / confocal microscopy | -                            |
| Western blotting                   | -                            |
| Western blot                       | -                            |
| -                                  | -                            |
| Western blot                       | -                            |
| -                                  | -                            |
| Western blotting                   | -                            |
| Western blotting                   | -                            |
| Western blotting                   | -                            |
| Western blot                       | -                            |
| Western blot                       | -                            |

|                                    |                              |
|------------------------------------|------------------------------|
| -                                  | -                            |
| Western blotting / immunochemistry | -                            |
| Western blotting / immunochemistry | -                            |
| -                                  | Upregulated RNA expression   |
| -                                  | Upregulated RNA expression   |
| -                                  | -                            |
| Western blot                       | -                            |
| -                                  | -                            |
| Western blot                       | -                            |
| Western blot                       | -                            |
| -                                  | -                            |
| Western blot                       | -                            |
| -                                  | Downregulated RNA expression |
| -                                  | Downregulated RNA expression |
| -                                  | Downregulated RNA expression |
| Western blot                       | -                            |
| -                                  | -                            |
| -                                  | Downregulated RNA expression |
| -                                  | Upregulated RNA expression   |
| -                                  | Upregulated RNA expression   |
| ELISA                              | -                            |
| LDH cytotoxicity detection kit     | -                            |
| ELISA                              | -                            |
| ELISA                              | -                            |
| ELISA                              | -                            |
| Western blot                       | -                            |
| Western blot                       | -                            |
| Western blot                       | -                            |

|                                     |                              |
|-------------------------------------|------------------------------|
| Western blot                        | -                            |
| Western blotting / ELISA            | -                            |
| -                                   | -                            |
| -                                   | -                            |
| Radioimmunoassay                    | -                            |
| Radioimmunoassay                    | -                            |
| Radioimmunoassay                    | -                            |
| ELISA                               | -                            |
| Western blot                        | -                            |
| -                                   | Downregulated RNA expression |
| -                                   | -                            |
| Western blot                        | -                            |
| -                                   | -                            |
| Western blot                        | -                            |
| Western blot                        | -                            |
| -                                   | Downregulated RNA expression |
| Western blot / Immunohistochemistry | -                            |
| Western blot / Immunohistochemistry | -                            |

|                                     |   |
|-------------------------------------|---|
| Western blot / Immunohistochemistry | - |
| Western blot / Immunohistochemistry | - |
| -                                   | - |
| Western blot                        | - |
| -                                   | - |
| Western blot                        | - |
| -                                   | - |
| Western blotting                    | - |
| Western blot                        | - |
| Western blot                        | - |
| ELISA                               | - |
| ELISA                               | - |
| ELISA                               | - |
| -                                   | - |
| ELISA                               | - |
| ELISA                               | - |
| ELISA                               | - |
| Western blot                        | - |
| -                                   | - |
| Western blot                        | - |
| -                                   | - |
| Western blot                        | - |
| Western blot                        | - |
| -                                   | - |
| Western blot / ELISA                | - |
| Western blot / ELISA                | - |
| Western blot / ELISA                | - |
| -                                   | - |
| Western blotting                    | - |
| Western blotting                    | - |
| Western blot                        | - |
| Western blot                        | - |
| Western blot                        | - |

[illegible]

|                                     |   |                              |
|-------------------------------------|---|------------------------------|
| ELISA                               | - |                              |
| ELISA                               | - |                              |
| ELISA                               | - |                              |
| Western blot                        | - |                              |
| Immunohistochemistry                | - |                              |
| Western blot                        | - |                              |
| -                                   | - |                              |
| Western blot / Immunohistochemistry | - |                              |
| -                                   | - |                              |
| -                                   | - |                              |
| -                                   | - |                              |
| Western blot / Immunohistochemistry | - |                              |
| Western blot / Immunohistochemistry | - |                              |
| Western blot / Immunohistochemistry | - |                              |
| -                                   | - |                              |
| Western blot                        | - |                              |
| Western blot                        | - |                              |
| Western blot                        | - |                              |
| -                                   |   | Downregulated RNA expression |
| -                                   |   | Downregulated RNA expression |
| -                                   |   | Downregulated RNA expression |
| Western blot                        | - |                              |
| Western blot                        | - |                              |
| Western blot                        | - |                              |



| Method | Year | PMID     |
|--------|------|----------|
| -      | 2011 | 21600966 |
| RT-PCR | 2011 | 21600966 |
| -      | 2011 | 21600966 |
| RT-PCR | 2011 | 21600966 |
| -      | 2016 | 27016057 |
| -      | 2013 | 23041106 |
| -      | 2013 | 23041106 |
| -      | 2013 | 23041106 |
| RT-PCR | 2013 | 23041106 |
| RT-PCR | 2013 | 23041106 |
| RT-PCR | 2013 | 23041106 |
| -      | 2013 | 23041106 |
| RT-PCR | 2013 | 23041106 |
| -      | 2021 | 34234667 |
| -      | 2021 | 34234667 |
| -      | 2021 | 34234667 |
| -      | 2015 | 26485504 |
| -      | 2015 | 26485504 |
| RT-PCR | 2015 | 26485504 |
| RT-PCR | 2015 | 26485504 |
| -      | 2019 | 31228802 |
| -      | 2019 | 31228802 |
| -      | 2019 | 31228802 |
| -      | 2019 | 31228802 |
| -      | 2019 | 31228802 |
| -      | 2019 | 31228802 |
| -      | 2019 | 31228802 |
| -      | 2019 | 31228802 |
| -      | 2019 | 31228802 |
| -      | 2016 | 27105682 |
| -      | 2016 | 27105682 |
| -      | 2016 | 27105682 |
| -      | 2016 | 27105682 |
| -      | 2020 | 31792810 |
| -      | 2020 | 31792810 |
| -      | 2020 | 31792810 |
| -      | 2020 | 31792810 |
| -      | 2020 | 31792810 |
| -      | 2011 | 21524691 |
| -      | 2011 | 21524691 |
| -      | 2011 | 21524691 |
| -      | 2011 | 21524691 |
| RT-PCR | 2011 | 21524691 |

|         |      |          |
|---------|------|----------|
| -       | 2014 | 24423938 |
| -       | 2014 | 24423938 |
| -       | 2014 | 24423938 |
| -       | 2014 | 24423938 |
| -       | 2014 | 24423938 |
| -       | 2019 | 30876978 |
| -       | 2019 | 30876978 |
| -       | 2019 | 30876978 |
| -       | 2018 | 29710456 |
| -       | 2018 | 29710456 |
| -       | 2018 | 29710456 |
| -       | 2018 | 29710456 |
| -       | 2018 | 29710456 |
| -       | 2018 | 29710456 |
| -       | 2018 | 29710456 |
| -       | 2018 | 29710456 |
| -       | 2018 | 29710456 |
| -       | 2018 | 29710456 |
| -       | 2018 | 29710456 |
| RT-PCR  | 2018 | 30622670 |
| RT-PCR  | 2018 | 30622670 |
| RT-PCR  | 2018 | 30622670 |
| -       | 2018 | 30622670 |
| -       | 2018 | 30622670 |
| RT-PCR  | 2017 | 28821706 |
| RT-PCR  | 2017 | 28821706 |
| RT-PCR  | 2017 | 28821706 |
| -       | 2017 | 28821706 |
| -       | 2017 | 28821706 |
| -       | 2016 | 26939761 |
| -       | 2016 | 26939761 |
| -       | 2016 | 26939761 |
| -       | 2015 | 26679678 |
| -       | 2015 | 26679678 |
| -       | 2015 | 26679678 |
| -       | 2015 | 26679678 |
| -       | 2020 | 32470450 |
| -       | 2020 | 32470450 |
| -       | 2020 | 32470450 |
| -       | 2020 | 32470450 |
| -       | 2020 | 32470450 |
| -       | 2020 | 32470450 |
| qRT-PCR | 2020 | 32470450 |

|                        |      |          |
|------------------------|------|----------|
| qRT-PCR                | 2020 | 32470450 |
| qRT-PCR                | 2020 | 32470450 |
| -                      | 2020 | 32470450 |
| qRT-PCR                | 2020 | 32470450 |
| -                      | 2021 | 33978900 |
| -                      | 2021 | 33978900 |
| -                      | 2021 | 33978900 |
| -                      | 2021 | 33978900 |
| -                      | 2021 | 33978900 |
| q-PCR                  | 2021 | 33978900 |
| -                      | 2020 | 31982469 |
| -                      | 2020 | 31982469 |
| RT-PCR                 | 2020 | 31982469 |
| -                      | 2018 | 29454613 |
| -                      | 2018 | 29454613 |
| -                      | 2018 | 29454613 |
| -                      | 2018 | 29454613 |
| -                      | 2018 | 29454613 |
| -                      | 2012 | 23123262 |
| -                      | 2012 | 23123262 |
| -                      | 2020 | 31927682 |
| -                      | 2020 | 31927682 |
| -                      | 2018 | 29402799 |
| RT-PCR                 | 2018 | 29402799 |
| RT-PCR                 | 2018 | 29402799 |
| RT-PCR                 | 2018 | 29402799 |
| -                      | 2018 | 29402799 |
| -                      | 2020 | 32108303 |
| -                      | 2020 | 31816340 |
| -                      | 2020 | 31816340 |
| -                      | 2020 | 31816340 |
| -                      | 2020 | 31816340 |
| -                      | 2021 | 33576458 |
| -                      | 2021 | 33576458 |
| -                      | 2021 | 33576458 |
| -                      | 2021 | 33576458 |
| -                      | 2021 | 33576458 |
| -                      | 2021 | 33576458 |
| q-PCR                  | 2016 | 26687185 |
| q-PCR                  | 2016 | 26687185 |
| -                      | 2011 | 22119079 |
| RT-PCR / sequenciation | 2011 | 22119079 |

|                     |      |          |
|---------------------|------|----------|
| RT-PCR / sequencing | 2011 | 22119079 |
| -                   | 2018 | 28495517 |
| -                   | 2018 | 28495517 |
| -                   | 2018 | 28495517 |
| -                   | 2018 | 28495517 |
| -                   | 2015 | 26043690 |
| -                   | 2015 | 26043690 |
| -                   | 2015 | 26043690 |
| -                   | 2010 | 20501058 |
| -                   | 2010 | 20501058 |
| -                   | 2019 | 31250662 |
| -                   | 2019 | 31250662 |
| -                   | 2019 | 31250662 |
| -                   | 2019 | 31250662 |
| -                   | 2019 | 31250662 |
| -                   | 2010 | 20387227 |
| RT-PCR / sequencing | 2010 | 20387227 |
| -                   | 2010 | 20387227 |
| RT-PCR / sequencing | 2010 | 20387227 |
| -                   | 2018 | 29974381 |
| -                   | 2018 | 29974381 |
| -                   | 2018 | 29974381 |
| -                   | 2018 | 29974381 |
| -                   | 2015 | 26059793 |
| -                   | 2015 | 26059793 |
| -                   | 2015 | 26059793 |
| -                   | 2019 | 30414381 |
| -                   | 2018 | 29243061 |
| -                   | 2018 | 29243061 |
| -                   | 2018 | 29243061 |
| -                   | 2018 | 29243061 |
| -                   | 2018 | 29243061 |
| -                   | 2015 | 26628981 |
| -                   | 2015 | 26628981 |
| -                   | 2015 | 26628981 |
| -                   | 2015 | 26628981 |
| -                   | 2015 | 26628981 |
| -                   | 2018 | 29353037 |
| -                   | 2018 | 29353037 |
| -                   | 2018 | 29353037 |
| -                   | 2018 | 29484272 |
| -                   | 2018 | 29484272 |
| -                   | 2018 | 29484272 |
| -                   | 2018 | 29484272 |
| -                   | 2019 | 31040648 |
| -                   | 2019 | 31040648 |

|        |      |          |
|--------|------|----------|
| -      | 2018 | 29777940 |
| -      | 2014 | 24777807 |
| -      | 2014 | 24777807 |
| RT-PCR | 2014 | 24777807 |
| RT-PCR | 2014 | 24777807 |
| -      | 2012 | 22709670 |
| -      | 2012 | 22709670 |
| -      | 2012 | 22709670 |
| -      | 2012 | 22709670 |
| -      | 2012 | 22709670 |
| -      | 2014 | 25330860 |
| -      | 2014 | 25330860 |
| -      | 2014 | 25330860 |
| -      | 2017 | 28683365 |
| -      | 2017 | 28683365 |
| -      | 2017 | 28683365 |
| -      | 2017 | 28683365 |
| -      | 2017 | 28683365 |
| RT-PCR | 2014 | 24631487 |
| RT-PCR | 2014 | 24631487 |
| RT-PCR | 2014 | 24631487 |
| -      | 2014 | 24631487 |
| -      | 2014 | 24631487 |
| -      | 2014 | 24631487 |
| -      | 2014 | 25221579 |
| -      | 2014 | 25221579 |
| -      | 2014 | 25221579 |
| -      | 2018 | 29426336 |
| RT-PCR | 2018 | 29426336 |
| -      | 2018 | 29426336 |
| -      | 2018 | 29426336 |
| -      | 2018 | 29426336 |
| -      | 2018 | 29426336 |
| -      | 2018 | 29426336 |
| -      | 2021 | 34988203 |
| -      | 2021 | 34988203 |
| -      | 2021 | 34988203 |
| -      | 2021 | 34988203 |
| -      | 2019 | 31230155 |
| -      | 2019 | 31230155 |
| -      | 2019 | 31230155 |

|        |      |          |
|--------|------|----------|
| -      | 2019 | 31230155 |
| -      | 2020 | 32361652 |
| -      | 2020 | 32361652 |
| -      | 2020 | 32361652 |
| -      | 2020 | 32361652 |
| -      | 2020 | 32361652 |
| -      | 2017 | 28957809 |
| -      | 2021 | 34602413 |
| -      | 2014 | 24720795 |
| -      | 2014 | 24720795 |
| -      | 2014 | 24720795 |
| -      | 2010 | 20618938 |
| -      | 2010 | 20618938 |
| -      | 2010 | 20618938 |
| -      | 2010 | 21151457 |
| -      | 2015 | 26240040 |
| -      | 2015 | 26240040 |
| -      | 2015 | 26240040 |
| -      | 2015 | 26240040 |
| -      | 2015 | 26240040 |
| RT-PCR | 2015 | 26240040 |
| -      | 2017 | 28054226 |
| -      | 2017 | 28054226 |
| -      | 2017 | 28054226 |
| -      | 2017 | 28054226 |
| -      | 2013 | 23646480 |
| -      | 2013 | 23646480 |
| -      | 2013 | 23646480 |
| -      | 2013 | 24517072 |
| -      | 2019 | 31412899 |
| -      | 2019 | 31412899 |
| -      | 2019 | 31412899 |
| -      | 2012 | 22342823 |
| -      | 2012 | 22342823 |
| -      | 2017 | 28011393 |
| RT-PCR | 2019 | 31639488 |
| -      | 2019 | 31639488 |
| -      | 2019 | 31639488 |

|   |      |          |
|---|------|----------|
| - | 2019 | 31639488 |
| - | 2019 | 31639488 |
| - | 2021 | 35003524 |
| - | 2021 | 35003524 |
| - | 2021 | 35003524 |
| - | 2021 | 35003524 |
| - | 2021 | 35003524 |
| - | 2021 | 35003524 |
| - | 2014 | 24189392 |
| - | 2014 | 24189392 |
| - | 2014 | 24189392 |
| - | 2011 | 21512969 |
| - | 2011 | 21512969 |
| - | 2013 | 23930775 |
| - | 2016 | 26746802 |
| - | 2021 | 34368862 |
| - | 2021 | 34368862 |
| - | 2021 | 34368862 |
| - | 2021 | 34368862 |
| - | 2021 | 34368862 |
| - | 2010 | 20845788 |
| - | 2010 | 20845788 |
| - | 2010 | 20845788 |
| - | 2010 | 20845788 |
| - | 2019 | 30815818 |
| - | 2019 | 30815818 |
| - | 2019 | 30815818 |
| - | 2019 | 30815818 |
| - | 2019 | 30815818 |
| - | 2019 | 30815818 |
| - | 2019 | 30815818 |
| - | 2019 | 30815818 |
| - | 2018 | 29542683 |
| - | 2018 | 29542683 |
| - | 2018 | 29542683 |
| - | 2019 | 31678414 |
| - | 2019 | 31678414 |
| - | 2019 | 31678414 |
| - | 2019 | 31678414 |
| - | 2021 | 34273708 |
| - | 2021 | 34273708 |
| - | 2021 | 34273708 |
| - | 2011 | 21168474 |
| - | 2011 | 21168474 |
| - | 2011 | 21168474 |

[illegible]



|        |      |          |
|--------|------|----------|
| -      | 2017 | 27871155 |
| -      | 2017 | 27871155 |
| -      | 2017 | 27871155 |
| -      | 2019 | 30696078 |
| -      | 2019 | 30696078 |
| -      | 2019 | 30696078 |
| -      | 2019 | 30696078 |
| -      | 2019 | 30696078 |
| -      | 2019 | 30551426 |
| -      | 2019 | 30551426 |
| -      | 2019 | 30551426 |
| -      | 2019 | 30551426 |
| -      | 2019 | 30551426 |
| -      | 2021 | 34302281 |
| -      | 2021 | 34302281 |
| -      | 2012 | 22659086 |
| -      | 2014 | 24532152 |
| -      | 2016 | 27889412 |
| -      | 2016 | 27889412 |
| -      | 2016 | 27889412 |
| -      | 2016 | 27889412 |
| -      | 2016 | 27087648 |
| -      | 2016 | 27087648 |
| -      | 2016 | 27087648 |
| -      | 2016 | 27087648 |
| RT-PCR | 2016 | 27087648 |
| RT-PCR | 2016 | 27087648 |
| RT-PCR | 2016 | 27087648 |
| -      | 2016 | 27087648 |
| -      | 2016 | 27087648 |
| -      | 2016 | 27087648 |

## Reference

- [illegible]

[illegible]

Mo ZT, Liao YL, Zheng J, Li WN. Icariin protects neurons from endoplasmic reticulum stress-induced apoptosis ;

Mo ZT, Liao YL, Zheng J, Li WN. Icariin protects neurons from endoplasmic reticulum stress-induced apoptosis ;

Mo ZT, Liao YL, Zheng J, Li WN. Icariin protects neurons from endoplasmic reticulum stress-induced apoptosis ;

Mo ZT, Liao YL, Zheng J, Li WN. Icariin protects neurons from endoplasmic reticulum stress-induced apoptosis ;

Dai M, Chen B, Wang X, Gao C, Yu H. Icariin enhance mild hypothermia-induced neuroprotection via inhibiting t

Dai M, Chen B, Wang X, Gao C, Yu H. Icariin enhance mild hypothermia-induced neuroprotection via inhibiting t

Dai M, Chen B, Wang X, Gao C, Yu H. Icariin enhance mild hypothermia-induced neuroprotection via inhibiting t

Dai M, Chen B, Wang X, Gao C, Yu H. Icariin enhance mild hypothermia-induced neuroprotection via inhibiting t

Dai M, Chen B, Wang X, Gao C, Yu H. Icariin enhance mild hypothermia-induced neuroprotection via inhibiting t

Dai M, Chen B, Wang X, Gao C, Yu H. Icariin enhance mild hypothermia-induced neuroprotection via inhibiting t

Dai M, Chen B, Wang X, Gao C, Yu H. Icariin enhance mild hypothermia-induced neuroprotection via inhibiting t

Dai M, Chen B, Wang X, Gao C, Yu H. Icariin enhance mild hypothermia-induced neuroprotection via inhibiting t

Dai M, Chen B, Wang X, Gao C, Yu H. Icariin enhance mild hypothermia-induced neuroprotection via inhibiting t

Dai M, Chen B, Wang X, Gao C, Yu H. Icariin enhance mild hypothermia-induced neuroprotection via inhibiting t

Park DJ, Jeon SJ, Kang JB, Koh PO. Quercetin Reduces Ischemic Brain Injury by Preventing Ischemia-induced Dec

Park DJ, Jeon SJ, Kang JB, Koh PO. Quercetin Reduces Ischemic Brain Injury by Preventing Ischemia-induced Dec

Park DJ, Jeon SJ, Kang JB, Koh PO. Quercetin Reduces Ischemic Brain Injury by Preventing Ischemia-induced Dec

Dai Y, Zhang H, Zhang J, Yan M. Isoquercetin attenuates oxidative stress and neuronal apoptosis after ischemia,

Dai Y, Zhang H, Zhang J, Yan M. Isoquercetin attenuates oxidative stress and neuronal apoptosis after ischemia,

Dai Y, Zhang H, Zhang J, Yan M. Isoquercetin attenuates oxidative stress and neuronal apoptosis after ischemia,

Dai Y, Zhang H, Zhang J, Yan M. Isoquercetin attenuates oxidative stress and neuronal apoptosis after ischemia,

Dai Y, Zhang H, Zhang J, Yan M. Isoquercetin attenuates oxidative stress and neuronal apoptosis after ischemia,

Guo C, Tong L, Xi M, Yang H, Dong H, Wen A. Neuroprotective effect of calycosin on cerebral ischemia and repe

Guo C, Tong L, Xi M, Yang H, Dong H, Wen A. Neuroprotective effect of calycosin on cerebral ischemia and repe

Hsu CC, Kuo TW, Liu WP, Chang CP, Lin HJ. Calycosin Preserves BDNF/TrkB Signaling and Reduces Post-Stroke N

Hsu CC, Kuo TW, Liu WP, Chang CP, Lin HJ. Calycosin Preserves BDNF/TrkB Signaling and Reduces Post-Stroke N

Wang Y, Ren Q, Zhang X, Lu H, Chen J. Neuroprotective Mechanisms of Calycosin Against Focal Cerebral Ischem

Wang Y, Ren Q, Zhang X, Lu H, Chen J. Neuroprotective Mechanisms of Calycosin Against Focal Cerebral Ischem

Wang Y, Ren Q, Zhang X, Lu H, Chen J. Neuroprotective Mechanisms of Calycosin Against Focal Cerebral Ischem

Wang Y, Ren Q, Zhang X, Lu H, Chen J. Neuroprotective Mechanisms of Calycosin Against Focal Cerebral Ischem

Jiao Y, Cao Y, Lu X, Wang J, Saitgareeva A, Kong X, Song C, Li J, Tian K, Zhang S, Bai M, Li S, Zhang H, Wang L. Xar

Wang CC, Ho YH, Hung CF, Kuo JR, Wang SJ. Xanthohumol, an active constituent from hope, affords protection

Wang CC, Ho YH, Hung CF, Kuo JR, Wang SJ. Xanthohumol, an active constituent from hope, affords protection

Wang CC, Ho YH, Hung CF, Kuo JR, Wang SJ. Xanthohumol, an active constituent from hope, affords protection

Wang CC, Ho YH, Hung CF, Kuo JR, Wang SJ. Xanthohumol, an active constituent from hope, affords protection

Guo H, Zhu L, Tang P, Chen D, Li Y, Li J, Bao C. Carthamin yellow improves cerebral ischemia-reperfusion injury

Guo H, Zhu L, Tang P, Chen D, Li Y, Li J, Bao C. Carthamin yellow improves cerebral ischemia-reperfusion injury

Guo H, Zhu L, Tang P, Chen D, Li Y, Li J, Bao C. Carthamin yellow improves cerebral ischemia-reperfusion injury

Guo H, Zhu L, Tang P, Chen D, Li Y, Li J, Bao C. Carthamin yellow improves cerebral ischemia-reperfusion injury

Guo H, Zhu L, Tang P, Chen D, Li Y, Li J, Bao C. Carthamin yellow improves cerebral ischemia-reperfusion injury

Guo H, Zhu L, Tang P, Chen D, Li Y, Li J, Bao C. Carthamin yellow improves cerebral ischemia-reperfusion injury

Liu P, Zou D, Chen K, Zhou Q, Gao Y, Huang Y, Zhu J, Zhang Q, Mi M. Dihydromyricetin Improves Hypobaric Hyp

Liu P, Zou D, Chen K, Zhou Q, Gao Y, Huang Y, Zhu J, Zhang Q, Mi M. Dihydromyricetin Improves Hypobaric Hyp

Hu J, Chai Y, Wang Y, Kheir MM, Li H, Yuan Z, Wan H, Xing D, Lei F, Du L. PI3K p55 $\gamma$  promoter activity enhancem

Hu J, Chai Y, Wang Y, Kheir MM, Li H, Yuan Z, Wan H, Xing D, Lei F, Du L. PI3K p55 $\gamma$  promoter activity enhancem

Hu J, Chai Y, Wang Y, Kheir MM, Li H, Yuan Z, Wan H, Xing D, Lei F, Du L. PI3K p55 $\gamma$  promoter activity enhancement by berberine in PC12 cells. *Neuroscience Letters*. 2006;392(1-2):105-108.

Maleki SN, Aboutaleb N, Sourì F. Berberine confers neuroprotection in coping with focal cerebral ischemia by t: *Journal of Neurochemistry*. 2006;97(2):455-464.

Maleki SN, Aboutaleb N, Sourì F. Berberine confers neuroprotection in coping with focal cerebral ischemia by t: *Journal of Neurochemistry*. 2006;97(2):455-464.

Maleki SN, Aboutaleb N, Sourì F. Berberine confers neuroprotection in coping with focal cerebral ischemia by t: *Journal of Neurochemistry*. 2006;97(2):455-464.

Chang CY, Kao TK, Chen WY, Ou YC, Li JR, Liao SL, Raung SL, Chen CJ. Tetramethylpyrazine inhibits neutrophil ac: *Journal of Neurochemistry*. 2006;97(2):455-464.

Chang CY, Kao TK, Chen WY, Ou YC, Li JR, Liao SL, Raung SL, Chen CJ. Tetramethylpyrazine inhibits neutrophil ac: *Journal of Neurochemistry*. 2006;97(2):455-464.

Chang CY, Kao TK, Chen WY, Ou YC, Li JR, Liao SL, Raung SL, Chen CJ. Tetramethylpyrazine inhibits neutrophil ac: *Journal of Neurochemistry*. 2006;97(2):455-464.

Xiao X, Liu Y, Qi C, Qiu F, Chen X, Zhang J, Yang P. Neuroprotection and enhanced neurogenesis by tetramethylp: *Journal of Neurochemistry*. 2006;97(2):455-464.

Xiao X, Liu Y, Qi C, Qiu F, Chen X, Zhang J, Yang P. Neuroprotection and enhanced neurogenesis by tetramethylp: *Journal of Neurochemistry*. 2006;97(2):455-464.

Ding Y, Du J, Cui F, Chen L, Li K. The protective effect of ligustrazine on rats with cerebral ischemia-reperfusion: *Journal of Neurochemistry*. 2006;97(2):455-464.

Ding Y, Du J, Cui F, Chen L, Li K. The protective effect of ligustrazine on rats with cerebral ischemia-reperfusion: *Journal of Neurochemistry*. 2006;97(2):455-464.

Ding Y, Du J, Cui F, Chen L, Li K. The protective effect of ligustrazine on rats with cerebral ischemia-reperfusion: *Journal of Neurochemistry*. 2006;97(2):455-464.

Ding Y, Du J, Cui F, Chen L, Li K. The protective effect of ligustrazine on rats with cerebral ischemia-reperfusion: *Journal of Neurochemistry*. 2006;97(2):455-464.

Yang XY, Liu QN, Zhang L, Jiang SQ, Gong PL. Neuroprotective effect of dauricine after transient middle cerebra: *Journal of Neurochemistry*. 2006;97(2):455-464.

Yang XY, Liu QN, Zhang L, Jiang SQ, Gong PL. Neuroprotective effect of dauricine after transient middle cerebra: *Journal of Neurochemistry*. 2006;97(2):455-464.

Yang XY, Liu QN, Zhang L, Jiang SQ, Gong PL. Neuroprotective effect of dauricine after transient middle cerebra: *Journal of Neurochemistry*. 2006;97(2):455-464.

Yang XY, Liu QN, Zhang L, Jiang SQ, Gong PL. Neuroprotective effect of dauricine after transient middle cerebra: *Journal of Neurochemistry*. 2006;97(2):455-464.

Sun R, Song Y, Li S, Ma Z, Deng X, Fu Q, Qu R, Ma S. Levo-tetrahydropalmatine Attenuates Neuron Apoptosis In: *Journal of Neurochemistry*. 2006;97(2):455-464.

Sun R, Song Y, Li S, Ma Z, Deng X, Fu Q, Qu R, Ma S. Levo-tetrahydropalmatine Attenuates Neuron Apoptosis In: *Journal of Neurochemistry*. 2006;97(2):455-464.

Sun R, Song Y, Li S, Ma Z, Deng X, Fu Q, Qu R, Ma S. Levo-tetrahydropalmatine Attenuates Neuron Apoptosis In: *Journal of Neurochemistry*. 2006;97(2):455-464.

Sun R, Song Y, Li S, Ma Z, Deng X, Fu Q, Qu R, Ma S. Levo-tetrahydropalmatine Attenuates Neuron Apoptosis In: *Journal of Neurochemistry*. 2006;97(2):455-464.

Mao XW, Pan CS, Huang P, Liu YY, Wang CS, Yan L, Hu BH, Chang X, He K, Mu HN, Li Q, Sun K, Fan JY, Han JY. Le: *Journal of Neurochemistry*. 2006;97(2):455-464.

Mao XW, Pan CS, Huang P, Liu YY, Wang CS, Yan L, Hu BH, Chang X, He K, Mu HN, Li Q, Sun K, Fan JY, Han JY. Le: *Journal of Neurochemistry*. 2006;97(2):455-464.

Mao XW, Pan CS, Huang P, Liu YY, Wang CS, Yan L, Hu BH, Chang X, He K, Mu HN, Li Q, Sun K, Fan JY, Han JY. Le: *Journal of Neurochemistry*. 2006;97(2):455-464.

Wu C, Chen J, Yang R, Duan F, Li S, Chen X. Mitochondrial protective effect of neferine through the modulation: *Journal of Neurochemistry*. 2006;97(2):455-464.

Huang L, Chen C, Zhang X, Li X, Chen Z, Yang C, Liang X, Zhu G, Xu Z. Neuroprotective Effect of Curcumin Against: *Journal of Neurochemistry*. 2006;97(2):455-464.

Huang L, Chen C, Zhang X, Li X, Chen Z, Yang C, Liang X, Zhu G, Xu Z. Neuroprotective Effect of Curcumin Against: *Journal of Neurochemistry*. 2006;97(2):455-464.

Huang L, Chen C, Zhang X, Li X, Chen Z, Yang C, Liang X, Zhu G, Xu Z. Neuroprotective Effect of Curcumin Against: *Journal of Neurochemistry*. 2006;97(2):455-464.

Huang L, Chen C, Zhang X, Li X, Chen Z, Yang C, Liang X, Zhu G, Xu Z. Neuroprotective Effect of Curcumin Against: *Journal of Neurochemistry*. 2006;97(2):455-464.

Huang L, Chen C, Zhang X, Li X, Chen Z, Yang C, Liang X, Zhu G, Xu Z. Neuroprotective Effect of Curcumin Against: *Journal of Neurochemistry*. 2006;97(2):455-464.

Li L, Li H, Li M. Curcumin protects against cerebral ischemia-reperfusion injury by activating JAK2/STAT3 signalin: *Journal of Neurochemistry*. 2006;97(2):455-464.

Li L, Li H, Li M. Curcumin protects against cerebral ischemia-reperfusion injury by activating JAK2/STAT3 signalin: *Journal of Neurochemistry*. 2006;97(2):455-464.

Li L, Li H, Li M. Curcumin protects against cerebral ischemia-reperfusion injury by activating JAK2/STAT3 signalin: *Journal of Neurochemistry*. 2006;97(2):455-464.

Li L, Li H, Li M. Curcumin protects against cerebral ischemia-reperfusion injury by activating JAK2/STAT3 signalin: *Journal of Neurochemistry*. 2006;97(2):455-464.

Lu Z, Liu Y, Shi Y, Shi X, Wang X, Xu C, Zhao H, Dong Q. Curcumin protects cortical neurons against oxygen and g: *Journal of Neurochemistry*. 2006;97(2):455-464.

Lu Z, Liu Y, Shi Y, Shi X, Wang X, Xu C, Zhao H, Dong Q. Curcumin protects cortical neurons against oxygen and g: *Journal of Neurochemistry*. 2006;97(2):455-464.

Lu Z, Liu Y, Shi Y, Shi X, Wang X, Xu C, Zhao H, Dong Q. Curcumin protects cortical neurons against oxygen and g: *Journal of Neurochemistry*. 2006;97(2):455-464.

Xie CJ, Gu AP, Cai J, Wu Y, Chen RC. Curcumin protects neural cells against ischemic injury in N2a cells and mou: *Journal of Neurochemistry*. 2006;97(2):455-464.

Xie CJ, Gu AP, Cai J, Wu Y, Chen RC. Curcumin protects neural cells against ischemic injury in N2a cells and mou: *Journal of Neurochemistry*. 2006;97(2):455-464.

Xie CJ, Gu AP, Cai J, Wu Y, Chen RC. Curcumin protects neural cells against ischemic injury in N2a cells and mou: *Journal of Neurochemistry*. 2006;97(2):455-464.

Xie CJ, Gu AP, Cai J, Wu Y, Chen RC. Curcumin protects neural cells against ischemic injury in N2a cells and mou: *Journal of Neurochemistry*. 2006;97(2):455-464.

Hou Y, Wang J, Feng J. The neuroprotective effects of curcumin are associated with the regulation of the recip: *Journal of Neurochemistry*. 2006;97(2):455-464.

Hou Y, Wang J, Feng J. The neuroprotective effects of curcumin are associated with the regulation of the recip: *Journal of Neurochemistry*. 2006;97(2):455-464.

Zhang Y, Fang M, Sun Y, Zhang T, Shi N, Li J, Jin L, Liu K, Fu J. Curcumin attenuates cerebral ischemia injury in Sp Liu L, Zhang W, Wang L, Li Y, Tan B, Lu X, Deng Y, Zhang Y, Guo X, Mu J, Yu G. Curcumin prevents cerebral ische Liu L, Zhang W, Wang L, Li Y, Tan B, Lu X, Deng Y, Zhang Y, Guo X, Mu J, Yu G. Curcumin prevents cerebral ische Liu L, Zhang W, Wang L, Li Y, Tan B, Lu X, Deng Y, Zhang Y, Guo X, Mu J, Yu G. Curcumin prevents cerebral ische Liu L, Zhang W, Wang L, Li Y, Tan B, Lu X, Deng Y, Zhang Y, Guo X, Mu J, Yu G. Curcumin prevents cerebral ische Simão F, Matté A, Pagnussat AS, Netto CA, Salbego CG. Resveratrol preconditioning modulates inflammatory re Simão F, Matté A, Pagnussat AS, Netto CA, Salbego CG. Resveratrol preconditioning modulates inflammatory re Simão F, Matté A, Pagnussat AS, Netto CA, Salbego CG. Resveratrol preconditioning modulates inflammatory re Simão F, Matté A, Pagnussat AS, Netto CA, Salbego CG. Resveratrol preconditioning modulates inflammatory re Simão F, Matté A, Pagnussat AS, Netto CA, Salbego CG. Resveratrol preconditioning modulates inflammatory re Wei H, Wang S, Zhen L, Yang Q, Wu Z, Lei X, Lv J, Xiong L, Xue R. Resveratrol attenuates the blood-brain barrier Wei H, Wang S, Zhen L, Yang Q, Wu Z, Lei X, Lv J, Xiong L, Xue R. Resveratrol attenuates the blood-brain barrier Wei H, Wang S, Zhen L, Yang Q, Wu Z, Lei X, Lv J, Xiong L, Xue R. Resveratrol attenuates the blood-brain barrier He Q, Li Z, Wang Y, Hou Y, Li L, Zhao J. Resveratrol alleviates cerebral ischemia/reperfusion injury in rats by inhi He Q, Li Z, Wang Y, Hou Y, Li L, Zhao J. Resveratrol alleviates cerebral ischemia/reperfusion injury in rats by inhi He Q, Li Z, Wang Y, Hou Y, Li L, Zhao J. Resveratrol alleviates cerebral ischemia/reperfusion injury in rats by inhi He Q, Li Z, Wang Y, Hou Y, Li L, Zhao J. Resveratrol alleviates cerebral ischemia/reperfusion injury in rats by inhi He Q, Li Z, Wang Y, Hou Y, Li L, Zhao J. Resveratrol alleviates cerebral ischemia/reperfusion injury in rats by inhi Chen S, Yin ZJ, Jiang C, Ma ZQ, Fu Q, Qu R, Ma SP. Asiaticoside attenuates memory impairment induced by tran Chen S, Yin ZJ, Jiang C, Ma ZQ, Fu Q, Qu R, Ma SP. Asiaticoside attenuates memory impairment induced by tran Chen S, Yin ZJ, Jiang C, Ma ZQ, Fu Q, Qu R, Ma SP. Asiaticoside attenuates memory impairment induced by tran Chen S, Yin ZJ, Jiang C, Ma ZQ, Fu Q, Qu R, Ma SP. Asiaticoside attenuates memory impairment induced by tran Chen S, Yin ZJ, Jiang C, Ma ZQ, Fu Q, Qu R, Ma SP. Asiaticoside attenuates memory impairment induced by tran Qi FY, Yang L, Tian Z, Zhao MG, Liu SB, An JZ. Neuroprotective effects of Asiaticoside. Neural Regen Res. 2014 Ju Qi FY, Yang L, Tian Z, Zhao MG, Liu SB, An JZ. Neuroprotective effects of Asiaticoside. Neural Regen Res. 2014 Ju Qi FY, Yang L, Tian Z, Zhao MG, Liu SB, An JZ. Neuroprotective effects of Asiaticoside. Neural Regen Res. 2014 Ju Liu X, Wen S, Yan F, Liu K, Liu L, Wang L, Zhao S, Ji X. Salidroside provides neuroprotection by modulating micro Liu X, Wen S, Yan F, Liu K, Liu L, Wang L, Zhao S, Ji X. Salidroside provides neuroprotection by modulating micro Liu X, Wen S, Yan F, Liu K, Liu L, Wang L, Zhao S, Ji X. Salidroside provides neuroprotection by modulating micro Liu X, Wen S, Yan F, Liu K, Liu L, Wang L, Zhao S, Ji X. Salidroside provides neuroprotection by modulating micro Liu X, Wen S, Yan F, Liu K, Liu L, Wang L, Zhao S, Ji X. Salidroside provides neuroprotection by modulating micro Liu X, Wen S, Yan F, Liu K, Liu L, Wang L, Zhao S, Ji X. Salidroside provides neuroprotection by modulating micro Liu X, Wen S, Yan F, Liu K, Liu L, Wang L, Zhao S, Ji X. Salidroside provides neuroprotection by modulating micro Liu X, Wen S, Yan F, Liu K, Liu L, Wang L, Zhao S, Ji X. Salidroside provides neuroprotection by modulating micro Liu X, Wen S, Yan F, Liu K, Liu L, Wang L, Zhao S, Ji X. Salidroside provides neuroprotection by modulating micro Liu J, Ma W, Zang CH, Wang GD, Zhang SJ, Wu HJ, Zhu KW, Xiang XL, Li CY, Liu KP, Guo JH, Li LY. Salidroside inhi Liu J, Ma W, Zang CH, Wang GD, Zhang SJ, Wu HJ, Zhu KW, Xiang XL, Li CY, Liu KP, Guo JH, Li LY. Salidroside inhi Liu J, Ma W, Zang CH, Wang GD, Zhang SJ, Wu HJ, Zhu KW, Xiang XL, Li CY, Liu KP, Guo JH, Li LY. Salidroside inhi Liu J, Ma W, Zang CH, Wang GD, Zhang SJ, Wu HJ, Zhu KW, Xiang XL, Li CY, Liu KP, Guo JH, Li LY. Salidroside inhi Zhang X, Lai W, Ying X, Xu L, Chu K, Brown J, Chen L, Hong G. Salidroside Reduces Inflammation and Brain Injury Zhang X, Lai W, Ying X, Xu L, Chu K, Brown J, Chen L, Hong G. Salidroside Reduces Inflammation and Brain Injury Zhang X, Lai W, Ying X, Xu L, Chu K, Brown J, Chen L, Hong G. Salidroside Reduces Inflammation and Brain Injury

[illegible]

Yin F, Zhou H, Fang Y, Li C, He Y, Yu L, Wan H, Yang J. Astragaloside IV alleviates ischemia reperfusion-induced a

Yin F, Zhou H, Fang Y, Li C, He Y, Yu L, Wan H, Yang J. Astragaloside IV alleviates ischemia reperfusion-induced a

Xiao L, Dai Z, Tang W, Liu C, Tang B. Astragaloside IV Alleviates Cerebral Ischemia-Reperfusion Injury through N

Xiao L, Dai Z, Tang W, Liu C, Tang B. Astragaloside IV Alleviates Cerebral Ischemia-Reperfusion Injury through N

Xiao L, Dai Z, Tang W, Liu C, Tang B. Astragaloside IV Alleviates Cerebral Ischemia-Reperfusion Injury through N

Xiao L, Dai Z, Tang W, Liu C, Tang B. Astragaloside IV Alleviates Cerebral Ischemia-Reperfusion Injury through N

Xiao L, Dai Z, Tang W, Liu C, Tang B. Astragaloside IV Alleviates Cerebral Ischemia-Reperfusion Injury through N

Jia D, Deng Y, Gao J, Liu X, Chu J, Shu Y. Neuroprotective effect of Panax notoginseng polysaccharides against foc

Jia D, Deng Y, Gao J, Liu X, Chu J, Shu Y. Neuroprotective effect of Panax notoginseng polysaccharides against foc

Jia D, Deng Y, Gao J, Liu X, Chu J, Shu Y. Neuroprotective effect of Panax notoginseng polysaccharides against foc

Chern CM, Liou KT, Wang YH, Liao JF, Yen JC, Shen YC. Andrographolide inhibits PI3K/AKT-dependent NOX2 and

Chern CM, Liou KT, Wang YH, Liao JF, Yen JC, Shen YC. Andrographolide inhibits PI3K/AKT-dependent NOX2 and

Yen TL, Hsu WH, Huang SK, Lu WJ, Chang CC, Lien LM, Hsiao G, Sheu JR, Lin KH. A novel bioactivity of androgra

Yen TL, Chen RJ, Jayakumar T, Lu WJ, Hsieh CY, Hsu MJ, Yang CH, Chang CC, Lin YK, Lin KH, Sheu JR. Andrograph

Li Y, Xiang LL, Miao JX, Miao MS, Wang C. Protective effects of andrographolide against cerebral ischemia-repe

Li Y, Xiang LL, Miao JX, Miao MS, Wang C. Protective effects of andrographolide against cerebral ischemia-repe

Li Y, Xiang LL, Miao JX, Miao MS, Wang C. Protective effects of andrographolide against cerebral ischemia-repe

Li Y, Xiang LL, Miao JX, Miao MS, Wang C. Protective effects of andrographolide against cerebral ischemia-repe

Li Y, Xiang LL, Miao JX, Miao MS, Wang C. Protective effects of andrographolide against cerebral ischemia-repe

Liu YG, Li FJ, Wang J, Wang XD. [Effects of Ginkgolide B on inflammation induced by cerebral ischemia-reperfus

Liu YG, Li FJ, Wang J, Wang XD. [Effects of Ginkgolide B on inflammation induced by cerebral ischemia-reperfus

Liu YG, Li FJ, Wang J, Wang XD. [Effects of Ginkgolide B on inflammation induced by cerebral ischemia-reperfus

Liu YG, Li FJ, Wang J, Wang XD. [Effects of Ginkgolide B on inflammation induced by cerebral ischemia-reperfus

Liu Q, Jin Z, Xu Z, Yang H, Li L, Li G, Li F, Gu S, Zong S, Zhou J, Cao L, Wang Z, Xiao W. Antioxidant effects of ginkg

Liu Q, Jin Z, Xu Z, Yang H, Li L, Li G, Li F, Gu S, Zong S, Zhou J, Cao L, Wang Z, Xiao W. Antioxidant effects of ginkg

Liu Q, Jin Z, Xu Z, Yang H, Li L, Li G, Li F, Gu S, Zong S, Zhou J, Cao L, Wang Z, Xiao W. Antioxidant effects of ginkg

Liu Q, Jin Z, Xu Z, Yang H, Li L, Li G, Li F, Gu S, Zong S, Zhou J, Cao L, Wang Z, Xiao W. Antioxidant effects of ginkg

Liu Q, Jin Z, Xu Z, Yang H, Li L, Li G, Li F, Gu S, Zong S, Zhou J, Cao L, Wang Z, Xiao W. Antioxidant effects of ginkg

Liu Q, Jin Z, Xu Z, Yang H, Li L, Li G, Li F, Gu S, Zong S, Zhou J, Cao L, Wang Z, Xiao W. Antioxidant effects of ginkg

Liu Q, Jin Z, Xu Z, Yang H, Li L, Li G, Li F, Gu S, Zong S, Zhou J, Cao L, Wang Z, Xiao W. Antioxidant effects of ginkg

Liu Q, Jin Z, Xu Z, Yang H, Li L, Li G, Li F, Gu S, Zong S, Zhou J, Cao L, Wang Z, Xiao W. Antioxidant effects of ginkg

Zhang W, Song JK, Yan R, Li L, Xiao ZY, Zhou WX, Wang ZZ, Xiao W, Du GH. Diterpene ginkgolides protect agains

Zhang W, Song JK, Yan R, Li L, Xiao ZY, Zhou WX, Wang ZZ, Xiao W, Du GH. Diterpene ginkgolides protect agains

Zhang W, Song JK, Yan R, Li L, Xiao ZY, Zhou WX, Wang ZZ, Xiao W, Du GH. Diterpene ginkgolides protect agains

Li X, Huang L, Liu G, Fan W, Li B, Liu R, Wang Z, Fan Q, Xiao W, Li Y, Fang W. Ginkgo diterpene lactones inhibit c

Li X, Huang L, Liu G, Fan W, Li B, Liu R, Wang Z, Fan Q, Xiao W, Li Y, Fang W. Ginkgo diterpene lactones inhibit c

Li X, Huang L, Liu G, Fan W, Li B, Liu R, Wang Z, Fan Q, Xiao W, Li Y, Fang W. Ginkgo diterpene lactones inhibit c

Li X, Huang L, Liu G, Fan W, Li B, Liu R, Wang Z, Fan Q, Xiao W, Li Y, Fang W. Ginkgo diterpene lactones inhibit c

Khadankhuu B, Fei Y, Li X, Fang W, Li Y. 10-O-(N N-Dimethylaminoethyl)-Ginkgolide B Methane-Sulfonate (XQ-1

Khadankhuu B, Fei Y, Li X, Fang W, Li Y. 10-O-(N N-Dimethylaminoethyl)-Ginkgolide B Methane-Sulfonate (XQ-1

Khadankhuu B, Fei Y, Li X, Fang W, Li Y. 10-O-(N N-Dimethylaminoethyl)-Ginkgolide B Methane-Sulfonate (XQ-1

Liu R, Zhang L, Lan X, Li L, Zhang TT, Sun JH, Du GH. Protection by borneol on cortical neurons against oxygen-gl

Liu R, Zhang L, Lan X, Li L, Zhang TT, Sun JH, Du GH. Protection by borneol on cortical neurons against oxygen-gl

Liu R, Zhang L, Lan X, Li L, Zhang TT, Sun JH, Du GH. Protection by borneol on cortical neurons against oxygen-gl



[illegible]

[illegible]

[illegible]

[illegible]

after OGD/R injury via suppressing IRE1 $\alpha$ -XBP1 signaling pathway. *Life Sci.* 2020 Aug 15;255:117847. doi: 10.1016/j.lfs.2020.117847.

after OGD/R injury via suppressing IRE1 $\alpha$ -XBP1 signaling pathway. *Life Sci.* 2020 Aug 15;255:117847. doi: 10.1016/j.lfs.2020.117847.

after OGD/R injury via suppressing IRE1 $\alpha$ -XBP1 signaling pathway. *Life Sci.* 2020 Aug 15;255:117847. doi: 10.1016/j.lfs.2020.117847.

after OGD/R injury via suppressing IRE1 $\alpha$ -XBP1 signaling pathway. *Life Sci.* 2020 Aug 15;255:117847. doi: 10.1016/j.lfs.2020.117847.

the activation of NF- $\kappa$ B in experimental ischemic stroke. *Metab Brain Dis.* 2021 Oct;36(7):1779-1790. doi: 10.1007/s12035-021-02500-0.

the activation of NF- $\kappa$ B in experimental ischemic stroke. *Metab Brain Dis.* 2021 Oct;36(7):1779-1790. doi: 10.1007/s12035-021-02500-0.

the activation of NF- $\kappa$ B in experimental ischemic stroke. *Metab Brain Dis.* 2021 Oct;36(7):1779-1790. doi: 10.1007/s12035-021-02500-0.

the activation of NF- $\kappa$ B in experimental ischemic stroke. *Metab Brain Dis.* 2021 Oct;36(7):1779-1790. doi: 10.1007/s12035-021-02500-0.

the activation of NF- $\kappa$ B in experimental ischemic stroke. *Metab Brain Dis.* 2021 Oct;36(7):1779-1790. doi: 10.1007/s12035-021-02500-0.

the activation of NF- $\kappa$ B in experimental ischemic stroke. *Metab Brain Dis.* 2021 Oct;36(7):1779-1790. doi: 10.1007/s12035-021-02500-0.

the activation of NF- $\kappa$ B in experimental ischemic stroke. *Metab Brain Dis.* 2021 Oct;36(7):1779-1790. doi: 10.1007/s12035-021-02500-0.

the activation of NF- $\kappa$ B in experimental ischemic stroke. *Metab Brain Dis.* 2021 Oct;36(7):1779-1790. doi: 10.1007/s12035-021-02500-0.

the activation of NF- $\kappa$ B in experimental ischemic stroke. *Metab Brain Dis.* 2021 Oct;36(7):1779-1790. doi: 10.1007/s12035-021-02500-0.

creases in the Neuronal Calcium Sensor Protein Hippocalcin. *Neuroscience.* 2020 Mar 15;430:47-62. doi: 10.1016/j.neuroscience.2020.03.030.

creases in the Neuronal Calcium Sensor Protein Hippocalcin. *Neuroscience.* 2020 Mar 15;430:47-62. doi: 10.1016/j.neuroscience.2020.03.030.

/reperfusion injury via Nrf2-mediated inhibition of the NOX4/ROS/NF- $\kappa$ B pathway. *Chem Biol Interact.* 2018;275:10-18. doi: 10.1016/j.cbi.2018.05.010.

/reperfusion injury via Nrf2-mediated inhibition of the NOX4/ROS/NF- $\kappa$ B pathway. *Chem Biol Interact.* 2018;275:10-18. doi: 10.1016/j.cbi.2018.05.010.

/reperfusion injury via Nrf2-mediated inhibition of the NOX4/ROS/NF- $\kappa$ B pathway. *Chem Biol Interact.* 2018;275:10-18. doi: 10.1016/j.cbi.2018.05.010.

/reperfusion injury via Nrf2-mediated inhibition of the NOX4/ROS/NF- $\kappa$ B pathway. *Chem Biol Interact.* 2018;275:10-18. doi: 10.1016/j.cbi.2018.05.010.

/reperfusion injury via Nrf2-mediated inhibition of the NOX4/ROS/NF- $\kappa$ B pathway. *Chem Biol Interact.* 2018;275:10-18. doi: 10.1016/j.cbi.2018.05.010.

reperfusion injury in rats. *J Ethnopharmacol.* 2012 Dec 18;144(3):768-74. doi: 10.1016/j.jep.2012.09.056. Epub 2012 Oct 15.

reperfusion injury in rats. *J Ethnopharmacol.* 2012 Dec 18;144(3):768-74. doi: 10.1016/j.jep.2012.09.056. Epub 2012 Oct 15.

neurological Injury after Cerebral Ischemia by Reducing Accumulation of Hypertrophic and TNF- $\alpha$ -Containing Lysosomes. *Cell Physiol Biochem.* 2018;45(2):537-546. doi: 10.1159/000487031. Epub 2018 Jan 15.

neurological Injury after Cerebral Ischemia by Reducing Accumulation of Hypertrophic and TNF- $\alpha$ -Containing Lysosomes. *Cell Physiol Biochem.* 2018;45(2):537-546. doi: 10.1159/000487031. Epub 2018 Jan 15.

neurological Injury after Cerebral Ischemia by Reducing Accumulation of Hypertrophic and TNF- $\alpha$ -Containing Lysosomes. *Cell Physiol Biochem.* 2018;45(2):537-546. doi: 10.1159/000487031. Epub 2018 Jan 15.

neurological Injury after Cerebral Ischemia by Reducing Accumulation of Hypertrophic and TNF- $\alpha$ -Containing Lysosomes. *Cell Physiol Biochem.* 2018;45(2):537-546. doi: 10.1159/000487031. Epub 2018 Jan 15.

neurological Injury after Cerebral Ischemia by Reducing Accumulation of Hypertrophic and TNF- $\alpha$ -Containing Lysosomes. *Cell Physiol Biochem.* 2018;45(2):537-546. doi: 10.1159/000487031. Epub 2018 Jan 15.

anthumol protects neuron from cerebral ischemia injury in experimental stroke. *Mol Biol Rep.* 2020 Apr;47(4):52. doi: 10.1007/s12275-020-00900-0.

against kainic acid-induced excitotoxicity in rats. *Neurochem Int.* 2020 Feb;133:104629. doi: 10.1016/j.neurochemint.2020.104629.

against kainic acid-induced excitotoxicity in rats. *Neurochem Int.* 2020 Feb;133:104629. doi: 10.1016/j.neurochemint.2020.104629.

against kainic acid-induced excitotoxicity in rats. *Neurochem Int.* 2020 Feb;133:104629. doi: 10.1016/j.neurochemint.2020.104629.

against kainic acid-induced excitotoxicity in rats. *Neurochem Int.* 2020 Feb;133:104629. doi: 10.1016/j.neurochemint.2020.104629.

by attenuating inflammation and ferroptosis in rats. *Int J Mol Med.* 2021 Apr;47(4):52. doi: 10.3892/ijmm.2021.4745.

by attenuating inflammation and ferroptosis in rats. *Int J Mol Med.* 2021 Apr;47(4):52. doi: 10.3892/ijmm.2021.4745.

by attenuating inflammation and ferroptosis in rats. *Int J Mol Med.* 2021 Apr;47(4):52. doi: 10.3892/ijmm.2021.4745.

by attenuating inflammation and ferroptosis in rats. *Int J Mol Med.* 2021 Apr;47(4):52. doi: 10.3892/ijmm.2021.4745.

by attenuating inflammation and ferroptosis in rats. *Int J Mol Med.* 2021 Apr;47(4):52. doi: 10.3892/ijmm.2021.4745.

oxia-Induced Memory Impairment via Modulation of SIRT3 Signaling. *Mol Neurobiol.* 2016 Dec;53(10):7200-7210. doi: 10.1007/s12035-016-0000-0.

oxia-Induced Memory Impairment via Modulation of SIRT3 Signaling. *Mol Neurobiol.* 2016 Dec;53(10):7200-7210. doi: 10.1007/s12035-016-0000-0.

ient is involved in the anti-apoptotic effect of berberine against cerebral ischemia-reperfusion. *Eur J Pharmacol.* 2020;845:173115. doi: 10.1016/j.ejphar.2020.173115.

ient is involved in the anti-apoptotic effect of berberine against cerebral ischemia-reperfusion. *Eur J Pharmacol.* 2020;845:173115. doi: 10.1016/j.ejphar.2020.173115.

ient is involved in the anti-apoptotic effect of berberine against cerebral ischemia-reperfusion. *Eur J Pharm*; targeting inflammatory cytokines. *J Chem Neuroanat*. 2018 Jan;87:54-59. doi: 10.1016/j.jchemneu.2017.04.001

targeting inflammatory cytokines. *J Chem Neuroanat*. 2018 Jan;87:54-59. doi: 10.1016/j.jchemneu.2017.04.001

targeting inflammatory cytokines. *J Chem Neuroanat*. 2018 Jan;87:54-59. doi: 10.1016/j.jchemneu.2017.04.001

targeting inflammatory cytokines. *J Chem Neuroanat*. 2018 Jan;87:54-59. doi: 10.1016/j.jchemneu.2017.04.001

activation following permanent cerebral ischemia in rats. *Biochem Biophys Res Commun*. 2015 Jul 31;463(3):547-55. doi: 10.1016/j.bbrc.2015.05.081

activation following permanent cerebral ischemia in rats. *Biochem Biophys Res Commun*. 2015 Jul 31;463(3):547-55. doi: 10.1016/j.bbrc.2015.05.081

activation following permanent cerebral ischemia in rats. *Biochem Biophys Res Commun*. 2015 Jul 31;463(3):547-55. doi: 10.1016/j.bbrc.2015.05.081

pyrazine in adult rat brain after focal ischemia. *Neurol Res*. 2010 Jun;32(5):547-55. doi: 10.1179/17431320910329111

pyrazine in adult rat brain after focal ischemia. *Neurol Res*. 2010 Jun;32(5):547-55. doi: 10.1179/17431320910329111

injury via activating PI3K/Akt pathway. *Hum Exp Toxicol*. 2019 Oct;38(10):1168-1177. doi: 10.1177/096032011987441

injury via activating PI3K/Akt pathway. *Hum Exp Toxicol*. 2019 Oct;38(10):1168-1177. doi: 10.1177/096032011987441

injury via activating PI3K/Akt pathway. *Hum Exp Toxicol*. 2019 Oct;38(10):1168-1177. doi: 10.1177/096032011987441

injury via activating PI3K/Akt pathway. *Hum Exp Toxicol*. 2019 Oct;38(10):1168-1177. doi: 10.1177/096032011987441

injury via activating PI3K/Akt pathway. *Hum Exp Toxicol*. 2019 Oct;38(10):1168-1177. doi: 10.1177/096032011987441

l artery occlusion in rats: involvement of Bcl-2 family proteins. *Am J Chin Med*. 2010;38(2):307-18. doi: 10.1111/j.1365-3113.2009.04307.x

l artery occlusion in rats: involvement of Bcl-2 family proteins. *Am J Chin Med*. 2010;38(2):307-18. doi: 10.1111/j.1365-3113.2009.04307.x

l artery occlusion in rats: involvement of Bcl-2 family proteins. *Am J Chin Med*. 2010;38(2):307-18. doi: 10.1111/j.1365-3113.2009.04307.x

l artery occlusion in rats: involvement of Bcl-2 family proteins. *Am J Chin Med*. 2010;38(2):307-18. doi: 10.1111/j.1365-3113.2009.04307.x

duced by Cerebral Ischemia-Reperfusion Injury: Involvement of c-Abl Activation. *J Mol Neurosci*. 2018 Jul;61(3):451-461. doi: 10.1007/s12031-018-1451-1

duced by Cerebral Ischemia-Reperfusion Injury: Involvement of c-Abl Activation. *J Mol Neurosci*. 2018 Jul;61(3):451-461. doi: 10.1007/s12031-018-1451-1

duced by Cerebral Ischemia-Reperfusion Injury: Involvement of c-Abl Activation. *J Mol Neurosci*. 2018 Jul;61(3):451-461. doi: 10.1007/s12031-018-1451-1

duced by Cerebral Ischemia-Reperfusion Injury: Involvement of c-Abl Activation. *J Mol Neurosci*. 2018 Jul;61(3):451-461. doi: 10.1007/s12031-018-1451-1

vo-tetrahydropalmatine attenuates mouse blood-brain barrier injury induced by focal cerebral ischemia and reperfusion. *Neuropharmacology*. 2018;145:103-112. doi: 10.1016/j.neuropharm.2017.09.011

vo-tetrahydropalmatine attenuates mouse blood-brain barrier injury induced by focal cerebral ischemia and reperfusion. *Neuropharmacology*. 2018;145:103-112. doi: 10.1016/j.neuropharm.2017.09.011

vo-tetrahydropalmatine attenuates mouse blood-brain barrier injury induced by focal cerebral ischemia and reperfusion. *Neuropharmacology*. 2018;145:103-112. doi: 10.1016/j.neuropharm.2017.09.011

of nuclear factor erythroid 2-related factor 2 signalling in ischaemic stroke. *Br J Pharmacol*. 2019 Feb;176(3):307-318. doi: 10.1111/bph.14511

t Cerebral Ischemia-Reperfusion Via Mediating Autophagy and Inflammation. *J Mol Neurosci*. 2018 Jan;64(1):1-11. doi: 10.1007/s12031-017-1111-1

t Cerebral Ischemia-Reperfusion Via Mediating Autophagy and Inflammation. *J Mol Neurosci*. 2018 Jan;64(1):1-11. doi: 10.1007/s12031-017-1111-1

t Cerebral Ischemia-Reperfusion Via Mediating Autophagy and Inflammation. *J Mol Neurosci*. 2018 Jan;64(1):1-11. doi: 10.1007/s12031-017-1111-1

t Cerebral Ischemia-Reperfusion Via Mediating Autophagy and Inflammation. *J Mol Neurosci*. 2018 Jan;64(1):1-11. doi: 10.1007/s12031-017-1111-1

ng pathway in rats. *Int J Clin Exp Med*. 2015 Sep 15;8(9):14985-91. PMID: 26628981; PMCID: PMC4658870.

ng pathway in rats. *Int J Clin Exp Med*. 2015 Sep 15;8(9):14985-91. PMID: 26628981; PMCID: PMC4658870.

ng pathway in rats. *Int J Clin Exp Med*. 2015 Sep 15;8(9):14985-91. PMID: 26628981; PMCID: PMC4658870.

ng pathway in rats. *Int J Clin Exp Med*. 2015 Sep 15;8(9):14985-91. PMID: 26628981; PMCID: PMC4658870.

ng pathway in rats. *Int J Clin Exp Med*. 2015 Sep 15;8(9):14985-91. PMID: 26628981; PMCID: PMC4658870.

glucose deprivation/reoxygenation injury through flotillin-1 and extracellular signal-regulated kinase1/2 pathway in rats. *Int J Clin Exp Med*. 2015 Sep 15;8(9):14985-91. PMID: 26628981; PMCID: PMC4658870.

glucose deprivation/reoxygenation injury through flotillin-1 and extracellular signal-regulated kinase1/2 pathway in rats. *Int J Clin Exp Med*. 2015 Sep 15;8(9):14985-91. PMID: 26628981; PMCID: PMC4658870.

glucose deprivation/reoxygenation injury through flotillin-1 and extracellular signal-regulated kinase1/2 pathway in rats. *Int J Clin Exp Med*. 2015 Sep 15;8(9):14985-91. PMID: 26628981; PMCID: PMC4658870.

se brain with ischemic stroke. *Brain Behav*. 2018 Jan 22;8(2):e00921. doi: 10.1002/brb3.921. PMID: 29484211

se brain with ischemic stroke. *Brain Behav*. 2018 Jan 22;8(2):e00921. doi: 10.1002/brb3.921. PMID: 29484211

se brain with ischemic stroke. *Brain Behav*. 2018 Jan 22;8(2):e00921. doi: 10.1002/brb3.921. PMID: 29484211

se brain with ischemic stroke. *Brain Behav*. 2018 Jan 22;8(2):e00921. doi: 10.1002/brb3.921. PMID: 29484211

ocal function between autophagy and HIF-1 $\alpha$  in cerebral ischemia-reperfusion injury. *Drug Des Devel Ther*. 2018;12:103-112. doi: 10.1177/1744501917744411

ocal function between autophagy and HIF-1 $\alpha$  in cerebral ischemia-reperfusion injury. *Drug Des Devel Ther*. 2018;12:103-112. doi: 10.1177/1744501917744411

rague-Dawley rats and PC12 cells by suppressing overactivated autophagy. *J Photochem Photobiol B*. 2018  
 mia reperfusion injury via increase of mitochondrial biogenesis. *Neurochem Res*. 2014 Jul;39(7):1322-31. doi:  
 mia reperfusion injury via increase of mitochondrial biogenesis. *Neurochem Res*. 2014 Jul;39(7):1322-31. doi:  
 mia reperfusion injury via increase of mitochondrial biogenesis. *Neurochem Res*. 2014 Jul;39(7):1322-31. doi:  
 response in the rat hippocampus following global cerebral ischemia. *Neurochem Int*. 2012 Oct;61(5):659-65.  
 response in the rat hippocampus following global cerebral ischemia. *Neurochem Int*. 2012 Oct;61(5):659-65.  
 response in the rat hippocampus following global cerebral ischemia. *Neurochem Int*. 2012 Oct;61(5):659-65.  
 response in the rat hippocampus following global cerebral ischemia. *Neurochem Int*. 2012 Oct;61(5):659-65.  
 dysfunction by regulation of the MMP-9/TIMP-1 balance after cerebral ischemia reperfusion in rats. *J Mol I*  
 dysfunction by regulation of the MMP-9/TIMP-1 balance after cerebral ischemia reperfusion in rats. *J Mol I*  
 dysfunction by regulation of the MMP-9/TIMP-1 balance after cerebral ischemia reperfusion in rats. *J Mol I*  
 biting NLRP3 inflammasome activation through Sirt1-dependent autophagy induction. *Int Immunopharmac*  
 biting NLRP3 inflammasome activation through Sirt1-dependent autophagy induction. *Int Immunopharmac*  
 biting NLRP3 inflammasome activation through Sirt1-dependent autophagy induction. *Int Immunopharmac*  
 biting NLRP3 inflammasome activation through Sirt1-dependent autophagy induction. *Int Immunopharmac*  
 sient cerebral ischemia-reperfusion in mice through anti-inflammatory mechanism. *Pharmacol Biochem Be*  
 sient cerebral ischemia-reperfusion in mice through anti-inflammatory mechanism. *Pharmacol Biochem Be*  
 sient cerebral ischemia-reperfusion in mice through anti-inflammatory mechanism. *Pharmacol Biochem Be*  
 sient cerebral ischemia-reperfusion in mice through anti-inflammatory mechanism. *Pharmacol Biochem Be*  
 J 1;9(13):1275-82. doi: 10.4103/1673-5374.137574. PMID: 25221579; PMCID: PMC4160853.  
 J 1;9(13):1275-82. doi: 10.4103/1673-5374.137574. PMID: 25221579; PMCID: PMC4160853.  
 J 1;9(13):1275-82. doi: 10.4103/1673-5374.137574. PMID: 25221579; PMCID: PMC4160853.  
 glial polarization after cerebral ischemia. *J Neuroinflammation*. 2018 Feb 9;15(1):39. doi: 10.1186/s12974-0  
 glial polarization after cerebral ischemia. *J Neuroinflammation*. 2018 Feb 9;15(1):39. doi: 10.1186/s12974-0  
 glial polarization after cerebral ischemia. *J Neuroinflammation*. 2018 Feb 9;15(1):39. doi: 10.1186/s12974-0  
 glial polarization after cerebral ischemia. *J Neuroinflammation*. 2018 Feb 9;15(1):39. doi: 10.1186/s12974-0  
 glial polarization after cerebral ischemia. *J Neuroinflammation*. 2018 Feb 9;15(1):39. doi: 10.1186/s12974-0  
 glial polarization after cerebral ischemia. *J Neuroinflammation*. 2018 Feb 9;15(1):39. doi: 10.1186/s12974-0  
 glial polarization after cerebral ischemia. *J Neuroinflammation*. 2018 Feb 9;15(1):39. doi: 10.1186/s12974-0  
 glial polarization after cerebral ischemia. *J Neuroinflammation*. 2018 Feb 9;15(1):39. doi: 10.1186/s12974-0  
 bits NLRP3 inflammasome activation and apoptosis in microglia induced by cerebral ischemia/reperfusion in  
 bits NLRP3 inflammasome activation and apoptosis in microglia induced by cerebral ischemia/reperfusion in  
 bits NLRP3 inflammasome activation and apoptosis in microglia induced by cerebral ischemia/reperfusion in  
 bits NLRP3 inflammasome activation and apoptosis in microglia induced by cerebral ischemia/reperfusion in  
 / After Permanent Middle Cerebral Artery Occlusion in Rats by Regulating PI3K/PKB/Nrf2/NFkB Signaling Ra  
 / After Permanent Middle Cerebral Artery Occlusion in Rats by Regulating PI3K/PKB/Nrf2/NFkB Signaling Ra  
 / After Permanent Middle Cerebral Artery Occlusion in Rats by Regulating PI3K/PKB/Nrf2/NFkB Signaling Ra

[illegible]



apoptosis by inhibiting the activation of key factors in death receptor pathway and mitochondrial pathway. .

apoptosis by inhibiting the activation of key factors in death receptor pathway and mitochondrial pathway. .

LRP3 Inflammasome-Mediated Pyroptosis Inhibition via Activating Nrf2. *Oxid Med Cell Longev*. 2021 Dec 30

LRP3 Inflammasome-Mediated Pyroptosis Inhibition via Activating Nrf2. *Oxid Med Cell Longev*. 2021 Dec 30

LRP3 Inflammasome-Mediated Pyroptosis Inhibition via Activating Nrf2. *Oxid Med Cell Longev*. 2021 Dec 30

LRP3 Inflammasome-Mediated Pyroptosis Inhibition via Activating Nrf2. *Oxid Med Cell Longev*. 2021 Dec 30

LRP3 Inflammasome-Mediated Pyroptosis Inhibition via Activating Nrf2. *Oxid Med Cell Longev*. 2021 Dec 30

LRP3 Inflammasome-Mediated Pyroptosis Inhibition via Activating Nrf2. *Oxid Med Cell Longev*. 2021 Dec 30

al cerebral ischemia reperfusion injury in rats. *Int J Biol Macromol*. 2014 Feb;63:177-80. doi: 10.1016/j.ijb

al cerebral ischemia reperfusion injury in rats. *Int J Biol Macromol*. 2014 Feb;63:177-80. doi: 10.1016/j.ijb

al cerebral ischemia reperfusion injury in rats. *Int J Biol Macromol*. 2014 Feb;63:177-80. doi: 10.1016/j.ijb

al cerebral ischemia reperfusion injury in rats. *Int J Biol Macromol*. 2014 Feb;63:177-80. doi: 10.1016/j.ijb

d iNOS expression protecting mice against hypoxia/ischemia-induced oxidative brain injury. *Planta Med*. 20

d iNOS expression protecting mice against hypoxia/ischemia-induced oxidative brain injury. *Planta Med*. 20

holide from *Andrographis paniculata* on cerebral ischemia/reperfusion-induced brain injury through induc

olide stimulates p38 mitogen-activated protein kinase-nuclear factor erythroid-2-related factor 2-heme oxy

rfusion injury in mice. *Int J Mol Med*. 2021 Oct;48(4):186. doi: 10.3892/ijmm.2021.5019. Epub 2021 Aug 9. I

rfusion injury in mice. *Int J Mol Med*. 2021 Oct;48(4):186. doi: 10.3892/ijmm.2021.5019. Epub 2021 Aug 9. I

rfusion injury in mice. *Int J Mol Med*. 2021 Oct;48(4):186. doi: 10.3892/ijmm.2021.5019. Epub 2021 Aug 9. I

rfusion injury in mice. *Int J Mol Med*. 2021 Oct;48(4):186. doi: 10.3892/ijmm.2021.5019. Epub 2021 Aug 9. I

rfusion injury in mice. *Int J Mol Med*. 2021 Oct;48(4):186. doi: 10.3892/ijmm.2021.5019. Epub 2021 Aug 9. I

ion in rats]. *Zhong Yao Cai*. 2010 Apr;33(4):578-80. Chinese. PMID: 20845788.

ion in rats]. *Zhong Yao Cai*. 2010 Apr;33(4):578-80. Chinese. PMID: 20845788.

ion in rats]. *Zhong Yao Cai*. 2010 Apr;33(4):578-80. Chinese. PMID: 20845788.

ion in rats]. *Zhong Yao Cai*. 2010 Apr;33(4):578-80. Chinese. PMID: 20845788.

golides and bilobalide against cerebral ischemia injury by activating the Akt/Nrf2 pathway in vitro and in vivo

golides and bilobalide against cerebral ischemia injury by activating the Akt/Nrf2 pathway in vitro and in vivo

golides and bilobalide against cerebral ischemia injury by activating the Akt/Nrf2 pathway in vitro and in vivo

golides and bilobalide against cerebral ischemia injury by activating the Akt/Nrf2 pathway in vitro and in vivo

golides and bilobalide against cerebral ischemia injury by activating the Akt/Nrf2 pathway in vitro and in vivo

golides and bilobalide against cerebral ischemia injury by activating the Akt/Nrf2 pathway in vitro and in vivo

golides and bilobalide against cerebral ischemia injury by activating the Akt/Nrf2 pathway in vitro and in vivo

golides and bilobalide against cerebral ischemia injury by activating the Akt/Nrf2 pathway in vitro and in vivo

at cerebral ischemia/reperfusion damage in rats by activating Nrf2 and CREB through PI3K/Akt signaling. *Act*

at cerebral ischemia/reperfusion damage in rats by activating Nrf2 and CREB through PI3K/Akt signaling. *Act*

at cerebral ischemia/reperfusion damage in rats by activating Nrf2 and CREB through PI3K/Akt signaling. *Act*

erebral ischemia/reperfusion induced inflammatory response in astrocytes via TLR4/NF- $\kappa$ B pathway in rats.

erebral ischemia/reperfusion induced inflammatory response in astrocytes via TLR4/NF- $\kappa$ B pathway in rats.

erebral ischemia/reperfusion induced inflammatory response in astrocytes via TLR4/NF- $\kappa$ B pathway in rats.

erebral ischemia/reperfusion induced inflammatory response in astrocytes via TLR4/NF- $\kappa$ B pathway in rats.

.H) Ameliorates Cerebral Ischemia Via Suppressing Neuronal Apoptosis. *J Stroke Cerebrovasc Dis*. 2021 Sep;

.H) Ameliorates Cerebral Ischemia Via Suppressing Neuronal Apoptosis. *J Stroke Cerebrovasc Dis*. 2021 Sep;

.H) Ameliorates Cerebral Ischemia Via Suppressing Neuronal Apoptosis. *J Stroke Cerebrovasc Dis*. 2021 Sep;

lucose deprivation/reperfusion: involvement of anti-oxidation and anti-inflammation through nuclear trans

lucose deprivation/reperfusion: involvement of anti-oxidation and anti-inflammation through nuclear trans

lucose deprivation/reperfusion: involvement of anti-oxidation and anti-inflammation through nuclear trans

[illegible]

[illegible]

[illegible]

[illegible]

.1016/j.lfs.2020.117847. Epub 2020 May 27. PMID: 32470450.

0.1007/s11011-021-00731-6. Epub 2021 May 12. PMID: 33978900.

.1016/j.neuroscience.2020.01.015. Epub 2020 Jan 23. PMID: 31982469.

.1016/j.neuroscience.2020.01.015. Epub 2020 Jan 23. PMID: 31982469.

.1016/j.neuroscience.2020.01.015. Epub 2020 Jan 23. PMID: 31982469.

3 Mar 25;284:32-40. doi: 10.1016/j.cbi.2018.02.017. Epub 2018 Feb 16. PMID: 29454613.

3 Mar 25;284:32-40. doi: 10.1016/j.cbi.2018.02.017. Epub 2018 Feb 16. PMID: 29454613.

3 Mar 25;284:32-40. doi: 10.1016/j.cbi.2018.02.017. Epub 2018 Feb 16. PMID: 29454613.

3 Mar 25;284:32-40. doi: 10.1016/j.cbi.2018.02.017. Epub 2018 Feb 16. PMID: 29454613.

3 Mar 25;284:32-40. doi: 10.1016/j.cbi.2018.02.017. Epub 2018 Feb 16. PMID: 29454613.

2012 Oct 30. PMID: 23123262.

2012 Oct 30. PMID: 23123262.

3 Microglia in Rats. J Neuroimmune Pharmacol. 2020 Jun;15(2):326-339. doi: 10.1007/s11481-019-C

3 Microglia in Rats. J Neuroimmune Pharmacol. 2020 Jun;15(2):326-339. doi: 10.1007/s11481-019-C

3 2018 Jan 25. PMID: 29402799.

7(4):2417-2425. doi: 10.1007/s11033-019-05128-4. Epub 2020 Feb 27. PMID: 32108303.

int.2019.104629. Epub 2019 Dec 6. PMID: 31816340.

.021.4885. Epub 2021 Feb 12. PMID: 33576458; PMCID: PMC7895518.

.021.4885. Epub 2021 Feb 12. PMID: 33576458; PMCID: PMC7895518.

.021.4885. Epub 2021 Feb 12. PMID: 33576458; PMCID: PMC7895518.

.021.4885. Epub 2021 Feb 12. PMID: 33576458; PMCID: PMC7895518.

.021.4885. Epub 2021 Feb 12. PMID: 33576458; PMCID: PMC7895518.

.021.4885. Epub 2021 Feb 12. PMID: 33576458; PMCID: PMC7895518.

)-7212. doi: 10.1007/s12035-015-9627-y. Epub 2015 Dec 19. Erratum in: Mol Neurobiol. 2017 Apr;5

)-7212. doi: 10.1007/s12035-015-9627-y. Epub 2015 Dec 19. Erratum in: Mol Neurobiol. 2017 Apr;5

acol. 2012 Jan 15;674(2-3):132-42. doi: 10.1016/j.ejphar.2011.11.014. Epub 2011 Nov 19. PMID: 22

acol. 2012 Jan 15;674(2-3):132-42. doi: 10.1016/j.ejphar.2011.11.014. Epub 2011 Nov 19. PMID: 22

acol. 2012 Jan 15;674(2-3):132-42. doi: 10.1016/j.ejphar.2011.11.014. Epub 2011 Nov 19. PMID: 22008. Epub 2017 May 8. PMID: 28495517; PMCID: PMC5812778.

008. Epub 2017 May 8. PMID: 28495517; PMCID: PMC5812778.

008. Epub 2017 May 8. PMID: 28495517; PMCID: PMC5812778.

008. Epub 2017 May 8. PMID: 28495517; PMCID: PMC5812778.

421-7. doi: 10.1016/j.bbrc.2015.05.088. Epub 2015 Jun 1. PMID: 26043690.

421-7. doi: 10.1016/j.bbrc.2015.05.088. Epub 2015 Jun 1. PMID: 26043690.

421-7. doi: 10.1016/j.bbrc.2015.05.088. Epub 2015 Jun 1. PMID: 26043690.

IX414533. PMID: 20501058.

IX414533. PMID: 20501058.

7119851260. Epub 2019 Jun 28. PMID: 31250662.

.142/S0192415X10007865. PMID: 20387227.

.142/S0192415X10007865. PMID: 20387227.

.142/S0192415X10007865. PMID: 20387227.

.142/S0192415X10007865. PMID: 20387227.

5(3):391-399. doi: 10.1007/s12031-018-1063-9. Epub 2018 Jul 4. PMID: 29974381.

5(3):391-399. doi: 10.1007/s12031-018-1063-9. Epub 2018 Jul 4. PMID: 29974381.

5(3):391-399. doi: 10.1007/s12031-018-1063-9. Epub 2018 Jul 4. PMID: 29974381.

5(3):391-399. doi: 10.1007/s12031-018-1063-9. Epub 2018 Jul 4. PMID: 29974381.

d reperfusion: Involvement of Src kinase. Sci Rep. 2015 Jun 10;5:11155. doi: 10.1038/srep11155. PMID: 25844442.

d reperfusion: Involvement of Src kinase. Sci Rep. 2015 Jun 10;5:11155. doi: 10.1038/srep11155. PMID: 25844442.

d reperfusion: Involvement of Src kinase. Sci Rep. 2015 Jun 10;5:11155. doi: 10.1038/srep11155. PMID: 25844442.

400-415. doi: 10.1111/bph.14537. Epub 2018 Dec 18. PMID: 30414381; PMCID: PMC6329622.

129-139. doi: 10.1007/s12031-017-1006-x. Epub 2017 Dec 15. PMID: 29243061.

129-139. doi: 10.1007/s12031-017-1006-x. Epub 2017 Dec 15. PMID: 29243061.

129-139. doi: 10.1007/s12031-017-1006-x. Epub 2017 Dec 15. PMID: 29243061.

129-139. doi: 10.1007/s12031-017-1006-x. Epub 2017 Dec 15. PMID: 29243061.

129-139. doi: 10.1007/s12031-017-1006-x. Epub 2017 Dec 15. PMID: 29243061.

hway. Biochem Biophys Res Commun. 2018 Feb 5;496(2):515-522. doi: 10.1016/j.bbrc.2018.01.089. PMID: 29384442.

hway. Biochem Biophys Res Commun. 2018 Feb 5;496(2):515-522. doi: 10.1016/j.bbrc.2018.01.089. PMID: 29384442.

hway. Biochem Biophys Res Commun. 2018 Feb 5;496(2):515-522. doi: 10.1016/j.bbrc.2018.01.089. PMID: 29384442.

72; PMCID: PMC5822585.

72; PMCID: PMC5822585.

72; PMCID: PMC5822585.

72; PMCID: PMC5822585.

2019 Apr 9;13:1135-1144. doi: 10.2147/DDDT.S194182. PMID: 31040648; PMCID: PMC6461000.

2019 Apr 9;13:1135-1144. doi: 10.2147/DDDT.S194182. PMID: 31040648; PMCID: PMC6461000.

[illegible]

njury by inhibiting the TLR4/NF- $\kappa$ B signaling pathway. *Ann Transl Med*. 2021 Nov;9(22):1694. doi: 10.2196/annals.2021.9.e1694.

njury by inhibiting the TLR4/NF- $\kappa$ B signaling pathway. *Ann Transl Med*. 2021 Nov;9(22):1694. doi: 10.2196/annals.2021.9.e1694.

njury by inhibiting the TLR4/NF- $\kappa$ B signaling pathway. *Ann Transl Med*. 2021 Nov;9(22):1694. doi: 10.2196/annals.2021.9.e1694.

njury by inhibiting the TLR4/NF- $\kappa$ B signaling pathway. *Ann Transl Med*. 2021 Nov;9(22):1694. doi: 10.2196/annals.2021.9.e1694.

rather than Complement C3 Activity. *Inflammation*. 2019 Oct;42(5):1830-1842. doi: 10.1007/s10753-019-01075-3.

rather than Complement C3 Activity. *Inflammation*. 2019 Oct;42(5):1830-1842. doi: 10.1007/s10753-019-01075-3.

rather than Complement C3 Activity. *Inflammation*. 2019 Oct;42(5):1830-1842. doi: 10.1007/s10753-019-01075-3.



rather than Complement C3 Activity. *Inflammation*. 2019 Oct;42(5):1830-1842. doi: 10.1007/s10753-019-01075-3. Epub 2019 Oct 30. PMID: 32361652

macol. 2020 Jul;84:106547. doi: 10.1016/j.intimp.2020.106547. Epub 2020 Apr 30. PMID: 32361652

macol. 2020 Jul;84:106547. doi: 10.1016/j.intimp.2020.106547. Epub 2020 Apr 30. PMID: 32361652

macol. 2020 Jul;84:106547. doi: 10.1016/j.intimp.2020.106547. Epub 2020 Apr 30. PMID: 32361652

macol. 2020 Jul;84:106547. doi: 10.1016/j.intimp.2020.106547. Epub 2020 Apr 30. PMID: 32361652

macol. 2020 Jul;84:106547. doi: 10.1016/j.intimp.2020.106547. Epub 2020 Apr 30. PMID: 32361652

716. doi: 10.1159/000480657. Epub 2017 Sep 22. PMID: 28957809.

p.12261. Epub 2014 Apr 10. PMID: 24720795.

p.12261. Epub 2014 Apr 10. PMID: 24720795.

p.12261. Epub 2014 Apr 10. PMID: 24720795.

000101.

pub 2015 Aug 4. PMID: 26240040.

267-278. doi: 10.1007/s12031-016-0870-0. Epub 2017 Jan 4. PMID: 28054226.

267-278. doi: 10.1007/s12031-016-0870-0. Epub 2017 Jan 4. PMID: 28054226.

267-278. doi: 10.1007/s12031-016-0870-0. Epub 2017 Jan 4. PMID: 28054226.

267-278. doi: 10.1007/s12031-016-0870-0. Epub 2017 Jan 4. PMID: 28054226.

PMID: 23646480.

PMID: 23646480.

PMID: 23646480.

s]. *Zhongguo Zhong Xi Yi Jie He Za Zhi*. 2013 Dec;33(12):1696-700. Chinese. PMID: 24517072.

MID: 31412899; PMCID: PMC6694654.

MID: 31412899; PMCID: PMC6694654.

MID: 31412899; PMCID: PMC6694654.

n Int. 2012 Apr;60(5):458-65. doi: 10.1016/j.neuint.2012.01.026. Epub 2012 Feb 8. PMID: 22342823

n Int. 2012 Apr;60(5):458-65. doi: 10.1016/j.neuint.2012.01.026. Epub 2012 Feb 8. PMID: 22342823

119. doi: 10.1016/j.neulet.2016.12.046. Epub 2016 Dec 21. PMID: 28011393.

J Ethnopharmacol. 2020 Feb 10;248:112319. doi: 10.1016/j.jep.2019.112319. Epub 2019 Oct 19. PMID: 31412899

J Ethnopharmacol. 2020 Feb 10;248:112319. doi: 10.1016/j.jep.2019.112319. Epub 2019 Oct 19. PMID: 31412899

J Ethnopharmacol. 2020 Feb 10;248:112319. doi: 10.1016/j.jep.2019.112319. Epub 2019 Oct 19. PMID: 31412899

J Ethnopharmacol. 2020 Feb 10;248:112319. doi: 10.1016/j.jep.2019.112319. Epub 2019 Oct 19. PMID: 31412899

J Ethnopharmacol. 2020 Feb 10;248:112319. doi: 10.1016/j.jep.2019.112319. Epub 2019 Oct 19. PMID: 31412899

J Ethnopharmacol. 2020 Feb 10;248:112319. doi: 10.1016/j.jep.2019.112319. Epub 2019 Oct 19. PMID: 31412899

J Ethnopharmacol. 2020 Feb 10;248:112319. doi: 10.1016/j.jep.2019.112319. Epub 2019 Oct 19. PMID: 31412899

[illegible]

[illegible]

[illegible]

41106.  
41106.  
41106.  
41106.  
41106.  
41106.  
41106.  
41106.  
fphar.2021.599543. PMID: 34234667; PMCID: PMC8255628.  
fphar.2021.599543. PMID: 34234667; PMCID: PMC8255628.  
fphar.2021.599543. PMID: 34234667; PMCID: PMC8255628.  
MID: 26485504.  
MID: 26485504.  
MID: 26485504.  
MID: 26485504.  
ID: 31228802.  
ID: 31228802.

.2017-019-08582-2. Epub 2019 Dec 2. PMID: 31792810.  
.2017-019-08582-2. Epub 2019 Dec 2. PMID: 31792810.



19903-9. Epub 2020 Jan 11. PMID: 31927682.  
19903-9. Epub 2020 Jan 11. PMID: 31927682.

4(3):2373-2374. PMID: 26687185.  
4(3):2373-2374. PMID: 26687185.  
119079.  
119079.

119079.

/AID: 26059793; PMCID: PMC4461916.

/AID: 26059793; PMCID: PMC4461916.

/AID: 26059793; PMCID: PMC4461916.

. Epub 2018 Jan 17. PMID: 29353037.

. Epub 2018 Jan 17. PMID: 29353037.

. Epub 2018 Jan 17. PMID: 29353037.



360.

360.

360.

0.21037/atm-21-5752. PMID: 34988203; PMCID: PMC8667139

0.21037/atm-21-5752. PMID: 34988203; PMCID: PMC8667140

0.21037/atm-21-5752. PMID: 34988203; PMCID: PMC8667140

0.21037/atm-21-5752. PMID: 34988203; PMCID: PMC8667140

019-01045-7. PMID: 31230155.

019-01045-7. PMID: 31230155.

019-01045-7. PMID: 31230155.

019-01045-7. PMID: 31230155.

2.  
2.  
2.  
2.  
2.

}.  
}.

IID: 31639488.  
IID: 31639488.  
IID: 31639488.  
IID: 31639488.  
IID: 31639488.  
IID: 31639488.  
IID: 31639488.

PMID: 31639488.

PMID: 31639488.

PMID: 23930775. Epub 2013 Jun 12. PMID: 23930775.

Transl Res. 2016 Apr;170:57-72. doi: 10.1016/j.trsl.2015.12.002. Epub 2015 Dec 17. PMID: 267468

PMID: 30815818; PMCID: PMC6439064.

PMID: 29542683; PMCID: PMC6289361.

PMID: 29542683; PMCID: PMC6289361.

PMID: 29542683; PMCID: PMC6289361.

PMID: 31678414.

PMID: 31678414.

PMID: 31678414.

PMID: 31678414.

3.

3.

3.

PMID: 21168474. Epub 2010 Dec 16. PMID: 21168474.

PMID: 21168474. Epub 2010 Dec 16. PMID: 21168474.

PMID: 21168474. Epub 2010 Dec 16. PMID: 21168474.

euroscience.2010.11.029. Epub 2010 Dec 16. PMID: 21168474.

ID: PMC8207641.  
ID: PMC8207641.  
ID: PMC8207641.  
ID: PMC8207641.  
ID: PMC8207641.  
ID: PMC8207641.

[illegible]















302.
